1 ***Trypanosoma cruzi* amastigotes have a reduced replication rate during chronic**  
2 **stage infections.**

3

4 Alexander I. Ward, Francisco Olmo, Richard Atherton, Martin C. Taylor and John M.  
5 Kelly\*

6

7 Department of Infection Biology,  
8 London School of Hygiene and Tropical Medicine,  
9 London, UK

10

11 \*For correspondence [john.kelly@lshtm.ac.uk](mailto:john.kelly@lshtm.ac.uk)

12

13

14

15

16

17

18

19

20

21

22

## 23 **Abstract**

24 Chronic *Trypanosoma cruzi* infections are typically life-long, with small numbers of  
25 parasites surviving in restricted tissue sites, which include the gastro-intestinal tract.  
26 There is considerable debate about the replicative status of these persistent parasites.  
27 Here, we investigated *T. cruzi* proliferation in the colon of chronically infected mice  
28 using 5-ethynyl-2'deoxyuridine incorporation into DNA to provide “snapshots” of  
29 parasite replication. Highly sensitive imaging of infection foci at single cell resolution  
30 revealed that parasites are three times more likely to be in S-phase during the acute  
31 stage than during the chronic stage. By implication, chronic infections are associated  
32 with a reduced rate of parasite replication. Despite this, very few host cells survive  
33 infection for >14 days, suggesting that *T. cruzi* persistence continues to involve regular  
34 cycles of replication, host cell lysis and re-infection. Therefore, long-term persistence  
35 in the colon is more likely to be associated with reduced proliferation than with  
36 dormancy.

37

38

39

40

41

42

43

44

## 45 Introduction

46 Disease latency, mediated by a wide range of mechanisms, is a common feature of  
47 viral, bacterial and parasitic infections (Weidner-Glunde *et al.* 2020; Dodd and  
48 Schlesinger, 2017; Barrett *et al.* 2019). However, there can be long-term  
49 consequences for the host, which include relapse and/or inflammatory pathology. The  
50 terms “persistent”, “dormant” and “metabolically quiescent” are used, often  
51 interchangeably, to describe pathogens in this state. The phenomenon has evolved  
52 independently and frequently in different pathogen groups, presumably because it acts  
53 to enhance survival and transmission. The “persister” phenotype does not involve the  
54 acquisition of selected mutations, and is often associated with treatment failure,  
55 antibiotic tolerance being the best studied example (Pontes *et al.* 2020; Mandal *et al.*  
56 2019). In the case of Chagas disease, some form of dormancy or restricted replication  
57 has been widely postulated as a mechanism that might explain long-term parasite  
58 survival and the high rate of treatment failure (Francisco *et al.* 2017).

59

60 Chagas disease is caused by the protozoan parasite *Trypanosoma cruzi*, which infects  
61 6-7 million people, mainly in Latin America. Better drugs and innovative immunological  
62 interventions are urgently required. Human infection is normally initiated when faeces  
63 of the triatomine insect vector, contaminated with metacyclic trypomastigote forms of  
64 the parasite, come into contact with the bite wound, or when they are rubbed into  
65 mucous membranes. An acute parasitaemia develops, which can be asymptomatic,  
66 or manifest as generalised symptoms such as fever, headache and muscle pain.  
67 Suppression of the infection is then mediated by a CD8+ T cell mediated response  
68 which reduces parasite numbers to extremely low levels (Cardillo *et al.* 2015, Tarleton,  
69 2015). A subset of infected individuals (~30%) eventually develop the classical

70 Chagasic cardiac and digestive symptoms, although this can be decades after the  
71 acute stage infection. Dilated cardiomyopathy and digestive megasyndromes are the  
72 most common morbidities, and can often be fatal (Bonney *et al.* 2019; Martinez *et al.*  
73 2020). It remains to be established how the parasite is able to persist long-term, albeit  
74 at very low levels, in the face of a robust adaptive immune response (Pack *et al.* 2018).  
75 Furthermore, the reasons why treatment failures are a common outcome need to be  
76 better understood at a mechanistic level to guide the design of improved  
77 chemotherapy (Gaspar *et al.* 2015). In this context, the recent report of a non-  
78 proliferative form of *T. cruzi* that is refractory to treatment with the front-line drug  
79 benznidazole (Sánchez-Valdéz *et al.* 2018) could have important implications.

80

81 The ability of human parasites to enter a long-term quiescent state, in which both  
82 replication and metabolism are slowed, has been described in *Toxoplasma gondii* (the  
83 bradyzoite) (Krishnan *et al.* 2020), and some *Plasmodium* species (Barrett *et al.* 2019).  
84 As with many prokaryotic pathogens (Fisher *et al.* 2017; Gollan *et al.* 2019), the  
85 ‘dormant’ state involves lower levels of DNA synthesis and transcription, down-  
86 regulation of energy catabolism, and activation of DNA damage/cellular stress  
87 responses. In *T. gondii*, a master transcription factor (BFD1), activated by stress  
88 response pathways, initiates the on-set of bradyzoite development (Waldman *et al.*  
89 2020). The precise triggers that lead to differentiation into the quiescent hypnozoite  
90 liver stage in some *Plasmodium spp.* have been elusive (Barrett *et al.* 2019). Amongst  
91 eukaryotic pathogens, these examples represent one end of the “dormancy spectrum”,  
92 in which entry into a quiescent metabolic state for extended periods. It has also been  
93 tentatively proposed that *Leishmania donovani* can undergo a form of dormancy,  
94 although the mechanisms involved are unknown (Tegazzini *et al.* 2016). The situation

95 in other *Leishmania spp.* is more definitive, with the identification of partially quiescent  
96 intracellular amastigotes which exhibit a slower metabolic flux and a reduced  
97 replication rate (Kloehn *et al.* 2015; Mandell and Beverley, 2017). This stops short of  
98 full long-term dormancy in which parasites enter G0/G1 cell cycle arrest. *Plasmodium*  
99 *falciparum* blood stage schizonts can also enter a transient state of dormancy, induced  
100 by treatment with the front-line drug artemisinin (Tucker *et al.* 2012; Teuscher *et al.*  
101 2012). This capacity to respond to stress by halting progress through the cell cycle  
102 exists in most cells that have DNA damage sensing machinery (Lanz *et al.* 2019;  
103 Verma *et al.* 2019). The existence of a non-replicative phenotype in mammalian forms  
104 of the African trypanosome, *Trypanosoma brucei*, beyond the G0/G1 arrested stumpy  
105 form required for onward transmission (Silvester *et al.* 2017), remains speculative.

106  
107 Observations of both *in vitro* and *in vivo* *T. cruzi* infections identified a sub-population  
108 of non-dividing intracellular amastigotes that retained the ability to differentiate into  
109 flagellated trypomastigotes, which were then able to propagate the infection (Sánchez-  
110 Valdéz *et al.* 2018). This phenomenon was defined as spontaneous dormancy on the  
111 basis of experiments that involved monitoring incorporation of the thymidine analogue  
112 5-ethynyl-2'deoxyuridine (EdU) into replicating DNA, and use of the tracker dye  
113 CellTrace Violet (CTV) to mark non-dividing parasites. Whether this represents long-  
114 term metabolic quiescence analogous to that in *T. gondii* and *Plasmodium spp.*, a  
115 slow-replicating phenotype as in *Leishmania spp.*, or temporary arrest induced by  
116 stress, as exhibited by *P. falciparum* and mammalian cells, is unresolved. In this latter  
117 context, the report that *T. cruzi* amastigotes have an intrinsic ability to reduce their  
118 replication rate by temporary cell cycle arrest in G1, as a response to stress, nutrient  
119 availability and drug treatment, may be of relevance (Dumoulin and Burleigh, 2018). It

120 is not known whether these represent overlapping or distinct mechanisms for entering  
121 a quiescent state. This could have implications for drug design, immunological  
122 interventions, and our understanding of *T. cruzi* persistence.

123

124 Using highly sensitive bioluminescence and fluorescence imaging (Lewis *et al.* 2014;  
125 Costa *et al.* 2018; Ward *et al.* 2020), we demonstrated that the gastrointestinal tract,  
126 specifically the colon and stomach, is a key site of *T. cruzi* persistence during chronic  
127 murine infections. Smooth muscle myocytes in the circular muscle layer of the colonic  
128 gut wall are the predominant host cell type. In the chronic stage, the entire colon  
129 typically contains only a few hundred parasites, often concentrated in a small number  
130 of cells that can contain >100 parasites. During the acute stage, however, when the  
131 parasite burden is considerably higher and many cells are infected, host cells  
132 containing >50 parasites are rarely found. Persistent parasites are also frequently  
133 detected in the skin during chronic infections, and in C3H/CeN mice, the skeletal  
134 muscle (Lewis *et al.* 2016; Ward *et al.* 2020). Further studies have also shown that  
135 parasite replication is asynchronous in individual host cells, a process that is  
136 independent of tissue location or disease stage, that replication of the nuclear and  
137 mitochondrial genomes is non-coordinated within the intracellular population, and that  
138 replicating amastigotes and non-replicating trypomastigotes can co-exist in the same  
139 cell (Taylor *et al.* 2020).

140

141 We have developed tissue processing protocols and imaging procedures that allow us  
142 to routinely detect *T. cruzi* persistence foci during chronic murine infections at single  
143 cell resolution (Costa *et al.* 2018; Ward *et al.* 2020). Here, we describe experiments

144 which provide new insights into parasite persistence, and demonstrate that chronic  
145 infections are associated with a reduced rate of parasite replication.

146

147

148

149

150

151

152

153

154

155

156

157

158

159

160

161

162

163

164

165

166

167

168

## 169 **Results**

170 We sought to explore parasite replication by using CTV, a tracker dye that has been  
171 employed as a marker for spontaneous dormancy in *T. cruzi* amastigotes (Sánchez-  
172 Valdes *et al.* 2018). This succinimidyl ester dye diffuses into cells, binds covalently to  
173 the amine groups of proteins, and becomes fluorescent following cleavage by  
174 intracellular esterases (Filby *et al.* 2015). CTV fluorescence undergoes serial dilution  
175 with each round of parasite cell division, resulting in an inverse correlation between  
176 dye retention and proliferation rate. However, reports that CTV itself can inhibit cell  
177 division (Lacy Kamm *et al.* 2020) prompted us to first investigate toxicity towards *T.*  
178 *cruzi*. Trypomastigotes were labelled by incubation for 20 minutes in 5 or 10  $\mu$ M CTV  
179 (Materials and methods), conditions that had been used previously to monitor parasite  
180 proliferation (Sánchez-Valdes *et al.* 2018). When these parasites were added to the  
181 Vero cell monolayer, we found they were 60% less infectious than trypomastigotes  
182 that had been incubated in the DMSO solvent alone (Figure 1A). In the first 48 hours  
183 post-infection, there was then limited division of intracellular CTV+ve parasites, with  
184 most trypanosomes in a state of growth arrest (Figure 1B and C). By 72 hours,  
185 replication had been more widely initiated, although the average number of  
186 amastigotes per infected cell was still significantly below that of the controls (Figure  
187 1B). Microscopy also revealed heterogeneity in the intensity of CTV-staining within the  
188 *T. cruzi* population (Figure 1C and D), with many parasites failing to replicate,  
189 particularly in the first 36-48 hours post-infection. At lower CTV concentrations (1 and  
190 2  $\mu$ M), growth inhibition was less evident and fewer parasites retained the dye at 5  
191 days post-infection (Figure 1D). Collectively, these experiments indicate that CTV is  
192 an inhibitor of trypomastigote infectivity and amastigote replication, and that the use  
193 of dye retention as a marker for dormancy and cell cycle arrest could lead to ambiguity.



194 Furthermore, the heterogeneous nature of *T. cruzi* CTV-staining, even within individual  
195 host cells (Figure 1C and D, supplementary Video 1), could result in differential growth  
196 and development rates within the same intracellular parasite population.

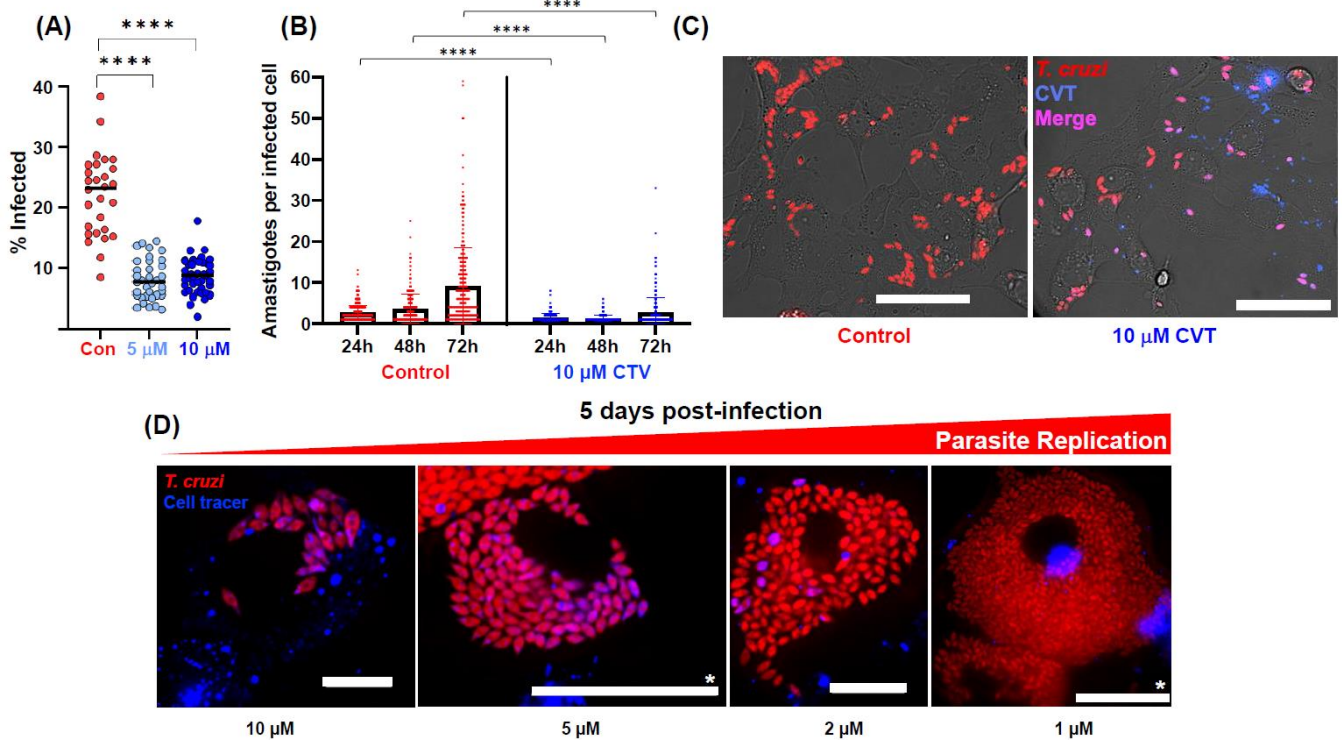

197

198 **Figure 1.** CellTrace Violet (CTV) reduces *T. cruzi* infectivity and inhibits intracellular proliferation. (A) *T.*  
199 *cruzi* CL-Luc::Scarlet trypomastigotes were incubated with either 5 or 10 μM CTV for 20 minutes and  
200 used to infect Vero cell monolayers at a multiplicity of infection of 10:1 (Materials and methods). 18  
201 hours later, infection efficiency was determined by inspecting a total of 2,203 (control), 3,781 (5 μM),  
202 and 3,840 (10 μM) Vero cells. At least 300 of these were infected in each case. Each data point  
203 corresponds to a randomly acquired image and represents the mean percentage of cells infected.  
204 Differences between columns were analysed using a parametric one-way ANOVA with Tukey's post  
205 hoc pair wise comparisons. \*\*\*\* $p \leq 0.0001$ . (B) Vero cells infected with CTV-ve or CTV+ve  
206 trypomastigotes (as above) were incubated for the time periods indicated. The numbers of amastigotes  
207 per infected host cell were then determined by analysing >300 infected cells per treatment. Error bars  
208 represent the standard deviation from the mean. Data were analysed using a Wilcoxon rank sum test.  
209 (C) Images of Vero cells 36 hours after infection with CTV-ve or CTV+ve trypomastigotes. Red,  
210 fluorescent *T. cruzi* amastigotes. Fluorescent parasites containing the CTV tracer dye appear as purple  
211 on a red fluorescent background. Size bars=20 μM (D) Images of Vero cells 5 days after infection with  
212 trypomastigotes that had been incubated with various concentrations of CTV, as indicated. Blue,  
213 intracellular vesicles containing CTV. See also supplementary Video 1. Size bars=20 μM, except where  
214 indicated; \*=50 μM.  
215

216 Prior to infection, we removed non-bound CTV by quenching with addition of bovine  
217 serum (Materials and methods). Despite this, some dye was taken up by mammalian  
218 cells and retained in stained vesicles for several days (Figure 1C and D,

219 supplementary Video 1). We found that it was important to ensure co-localisation of  
220 blue (CTV), red (fluorescent parasites) and/or green (DAPI - DNA) staining to avoid  
221 the risk of confusing amastigotes and spherical CTV-containing vesicles, both of which  
222 appear motile in the highly dynamic cytoplasmic environment.

223

224 We then used the thymidine analogue EdU to monitor parasite proliferation. In *T. cruzi*,  
225 incorporation of EdU provides a readout on the replicative status of both nuclear and  
226 mitochondrial DNA (kDNA) (Costa *et al.* 2018; Taylor *et al.* 2020). However, the  
227 procedure has to be used with caution, since EdU exposure *in vitro* can be associated  
228 with toxicity. In cultured mammalian cells, this is characterised by genome instability,  
229 DNA damage and cell cycle arrest (Kohlmeier *et al.* 2013; Zhao *et al.* 2013; Ligasová  
230 *et al.* 2015). Short-term exposure at lower concentrations (<12 hours, <10  $\mu$ M)  
231 appears to have less impact, and does not perturb cell cycle kinetics (Pereira *et al.*  
232 2017). Toxicity against *T. cruzi in vitro* has also been shown to be dependent on  
233 exposure time; 2 and 4 hours had only minor inhibitory effects on intracellular  
234 amastigotes, even at 70  $\mu$ M, whereas with 24 hours continuous exposure, the IC<sub>50</sub>  
235 dropped to 70 nM (Sykes *et al.* 2020). In contrast, when infected cells were cultured  
236 for 72 hours in presence of 100  $\mu$ M EdU, there was no reported inhibition of amastigote  
237 replication (Sánchez-Valdéz *et al.* 2018). Given these conflicting observations, as a  
238 preliminary to *in vivo* studies, we assessed the *in vitro* kinetics and growth inhibitory  
239 effects of EdU on intracellular amastigotes of *T. cruzi* CL-Luc::Neon (a derivative of  
240 the CL Brener strain). This parasite reporter line expresses a fusion protein that is both  
241 bioluminescent and fluorescent (Costa *et al.* 2018). After only 10 minutes exposure,  
242 amastigotes were clearly labelled, and it was possible to distinguish those that were  
243 EdU+ve from those that were EdU-ve (Figure 2A). Similar heterogeneity, including

244 differential labelling of nuclear and kDNA, was observed when infected cells were  
245 pulse labelled for 1 or 6 hours at different EdU concentrations (Figure 2B and C). This  
246 pattern results from asynchronous amastigote replication (Taylor *et al.* 2020), with EdU  
247 negativity/positivity determined by the position of individual parasites within the cell  
248 cycle during the period of exposure. When we assessed the extent of EdU growth  
249 inhibition after a 6-hour pulse and a 3-day chase period, we established an IC<sub>50</sub> of 1.67  
250  $\mu$ M, although the level of inhibition plateaued at 70% (Figure 2E). These outcomes are  
251 therefore consistent with those reported by Sykes *et al.* 2020.

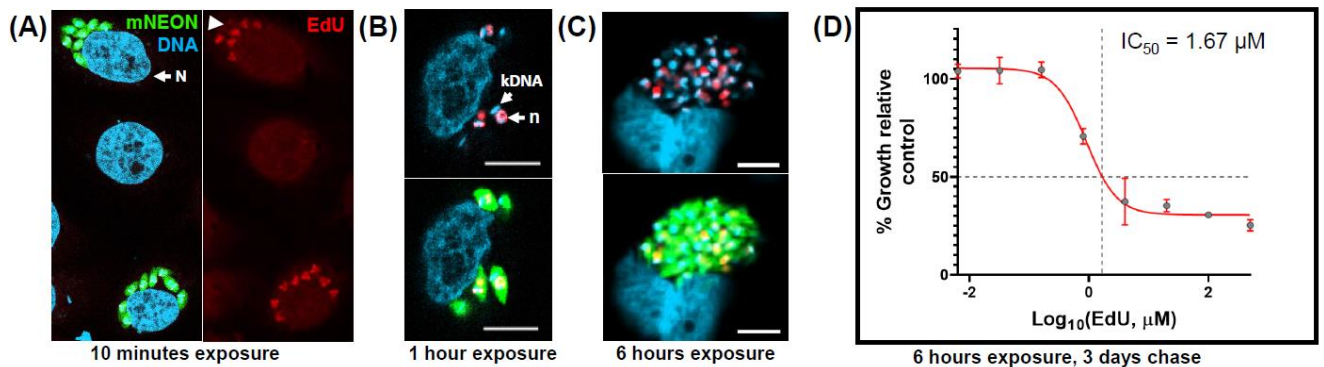

253 **Figure 2.** EdU incorporation by *T. cruzi* amastigotes *in vitro* is rapid, heterogeneous within the  
254 population, and can inhibit parasite growth. (A) *T. cruzi* CL-Luc::Neon trypanomastigotes were used to  
255 infect MA104 cells at an MOI of 5:1 (Materials and methods). 2 days later, cultures were pulsed for 10  
256 minutes with EdU (50  $\mu$ M) and then examined by confocal microscopy. The image shows adjacent  
257 infected cells where in one instance, all 8 amastigotes are EdU+ve, whereas in the other, 2/8 are EdU-  
258 ve (indicated by white arrowhead). N, host cell nucleus. (B) EdU labelling of amastigotes after 1 hour  
259 exposure (40  $\mu$ M). kDNA, kinetoplast DNA; n, parasite nucleus. (C) EdU labelling of amastigotes after  
260 6 hours exposure (10  $\mu$ M). Scale bars=10  $\mu$ m in all cases. (D) MA104 cells were infected with  
261 trypanomastigotes, and 2 days later, the cultures were pulsed for 6 hours with EdU at a range of  
262 concentrations, and then washed thoroughly. After a further 3 days incubation, amastigote growth was  
263 determined by assessing expression of the mNeonGreen reporter (Materials and methods). The  
264 inhibition curve was plotted using PRISM graphpad to establish the concentration of EdU that conferred  
265 50% growth inhibition compared to untreated controls. Data were derived from 5 replicates (CI<sub>95</sub> 0.98  
266  $\mu$ M-4.83  $\mu$ M).  
267

268 We next compared the dynamics of EdU incorporation by parasites during acute and  
269 chronic murine infections with the *T. cruzi* CL-Luc::Neon strain. The elimination half-  
270 life (T<sub>1/2</sub>) of EdU in mice has not been determined, but with other thymidine analogues,  
271 the period is relatively short. For example, the availability of bromodeoxyuridine (BrdU)  
272 for incorporation into mouse DNA is less than 15 minutes (Mandyam *et al.* 2007).

273 Infected C3H/HeN mice were therefore given two EdU injections (each of 12.5 mg kg<sup>-1</sup>)  
 274 <sup>1</sup>), 6 hours apart (Figure 3A), in an attempt to highlight a greater number of parasites  
 275 where DNA replication was underway.

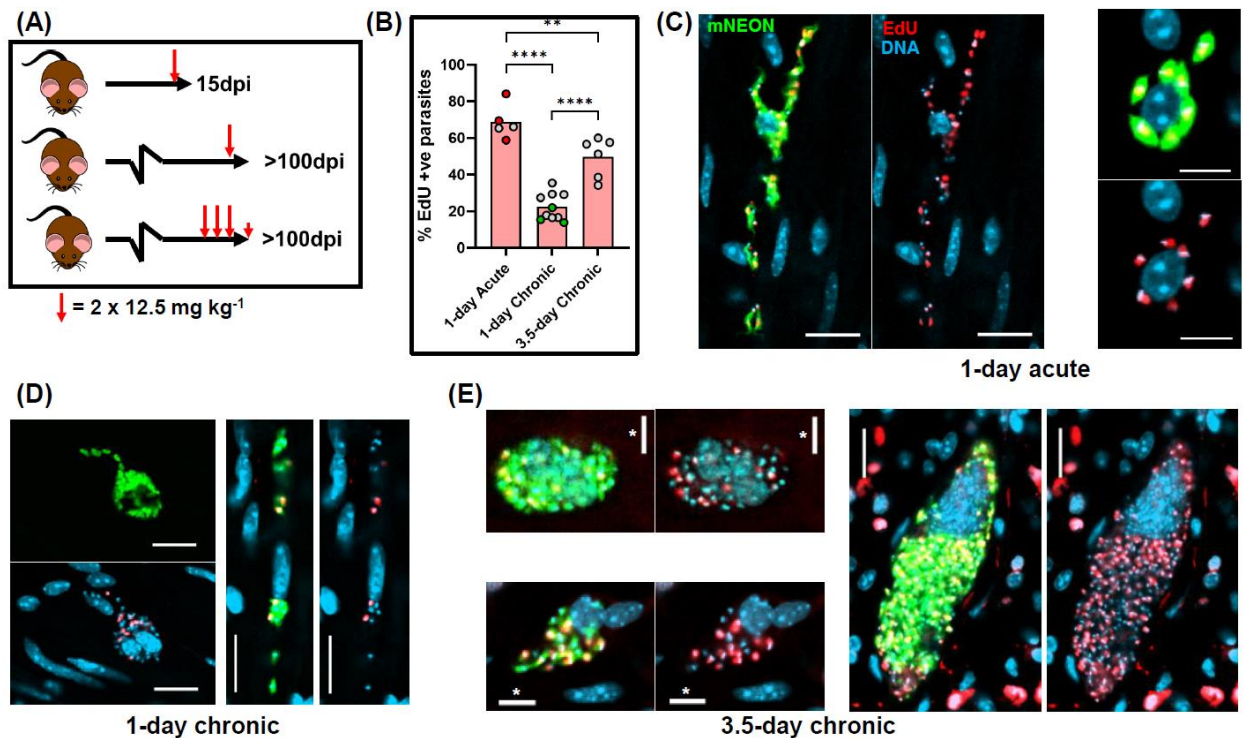

276

277 **Figure 3.** Intracellular *T. cruzi* replication, as inferred by EdU incorporation, is slower in the chronic  
 278 stage than during acute infections. (A) Schematic showing experimental outline. C3H/HeN mice  
 279 infected with *T. cruzi* CL-Luc::Neon were injected with EdU as indicated during the acute (15 days post-  
 280 infection; dpi) or chronic stage (>100 dpi). Larger red arrows indicate 2 i.p. injections separated by 6  
 281 hours; smaller red arrow indicates a single i.p. injection on day 4. (B) Percentage of parasites that were  
 282 EdU+ve under each treatment regimen. Colonic tissue was extracted from mice *post-mortem*, 18 hours  
 283 after the second injection (1-day treatment) or 4 hours after the final injection (3.5-days treatment), and  
 284 infected cells detected by *ex vivo* imaging and confocal microscopy (Materials and methods) (Figure 3  
 285 - figure supplement 1) (Ward *et al.* 2020). Each data point represents a single mouse. Red data points  
 286 indicate mice aged ~150 days at the start of acute infection, and act as age matched controls for chronic  
 287 stage mice. In the chronically infected mice, green data points indicate colons processed by standard  
 288 histological sectioning, and grey points highlight those processed through peeling away of the mucosal  
 289 layer and whole mounting the remaining colonic gut wall (Materials and methods). No significant  
 290 differences were observed in the % EdU+ve parasites in colonic sections processed by each method  
 291 (Wilcoxon rank sum test). For comparison of treatment conditions, statistical analysis was performed  
 292 as described (Materials and methods); \*\*\*\*= $p \leq 0.0001$  and \*\*= $p \leq 0.01$ . (C) Representative images of  
 293 infected colonic muscle cells from an acute stage mouse. Labelling: parasites, green; DNA, blue (DAPI  
 294 staining); EdU, red. EdU labelling on a green background appears yellow. (D and E) Images of infected  
 295 colonic muscle tissue from chronically infected mice after EdU labelling using the 1-day and 3.5-day  
 296 regimen, respectively (see also Figure 3 - figure supplement 2). Scale bars=20 μm, except where  
 297 indicated; \*=10 μm.

298

299 At any one time, as judged by *in vitro* experiments, approximately 25-30% of  
 300 amastigotes will be in S-phase (Dumoulin and Burleigh, 2018). In the majority of cases,



301 the external gut wall mount methodology (Ward *et al.* 2020) was used to process the  
302 resulting tissue samples. The protocol enables the muscular coat, including the  
303 longitudinal and circular smooth muscle layers, which contain the majority of colon-  
304 localised parasites during chronic stage infections, to be visualised in their entirety at  
305 a 3-dimensional level with single-cell resolution (Materials and methods). Intracellular  
306 parasite numbers can be determined with accuracy by confocal microscopy using  
307 serial Z-stacking (Figure 3 – figure supplement 1). On occasions, infected host cells in  
308 colonic tissue were also investigated by coupling *ex vivo* bioluminescence-guided  
309 excision and confocal microscopy (Materials and methods) (Taylor *et al.* 2020).

310

311 Colon samples were excised *post-mortem*, 18 hours after the second injection, and the  
312 incorporated EdU labelled by click chemistry. We observed significantly greater levels  
313 of parasite labelling in tissue obtained from acute stage mice than from those that were  
314 chronically infected (70% vs 20%) (Figure 3 and 4, Figure 3 – figure supplement 2).  
315 Therefore, during the acute stage, a greater fraction of the parasite population is  
316 replicating their nuclear and/or mitochondrial DNA at any specific point in time. By  
317 inference, the amastigote replication rate must be slower during chronic infections, at  
318 least in this tissue location. There were no differences in the data derived from colonic  
319 tissue processed by the two differing methodologies (grey and green dots, Figure 3B).  
320 We further observed that during the acute stage, there was a positive correlation  
321 between the number of parasites per infected cell and the percentage of parasites  
322 where DNA synthesis was ongoing (Figure 4B). Large parasites nests were less  
323 common during the acute stage, with few instances where infected cells contained  
324 more than 50 parasites (Figure 4A-C). We did attempt to quantify, for comparative  
325 purposes, the relative level of EdU labelling in each parasite. However, since most

326 images were taken with whole mounted tissue sections, the variable depths of  
 327 parasites from the surface made this technically challenging. As judged by visual  
 328 inspection, the majority of EdU+ve parasites in any one cell were labelled to a similar  
 329 extent (Figure 3C-E, Figure 3 – figure supplement 2). Since smooth muscle cells, the  
 330 most frequently infected cell type in the colon (Ward *et al.* 2020), are typically non-  
 331 dividing, the nuclei of host cells were generally unlabelled.

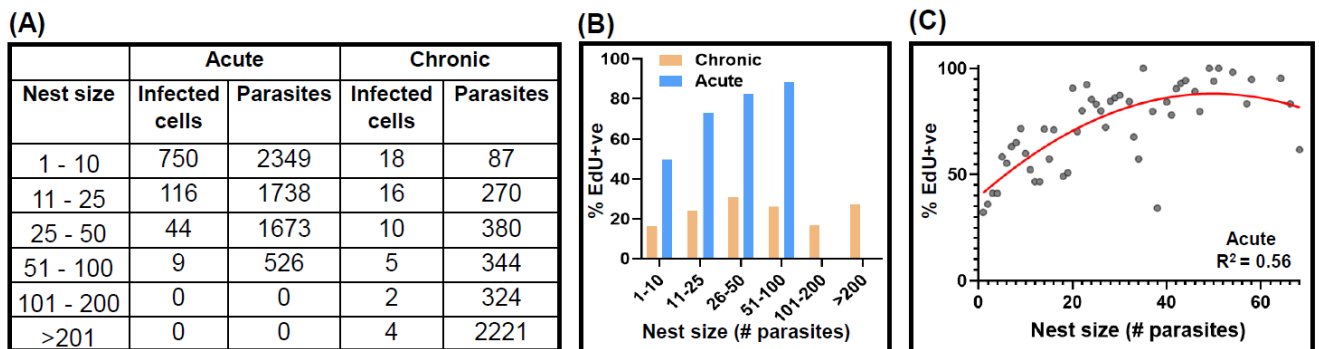

332

333 **Figure 4.** The inferred parasite replication rate is higher during the acute stage and correlates positively  
 334 with nest size at this phase of the infection. (A) The number of infected cells (nests) detected in colonic  
 335 gut wall tissue from mice in the acute (n=5) and chronic (n=7) stage, and the number of parasites found  
 336 in each category. Tissue was processed using the colon peeling procedure (Materials and methods).  
 337 (B) Percentage EdU+ve parasites in infected cells during acute and chronic infections in relation to nest  
 338 size. (C) Relating nest size to the % EdU+ve parasites during acute stage infection. Each point  
 339 corresponds to a specific nest size (x-axis), and the corresponding % EdU+ve mean percentage value  
 340 across all mice (y-axis).  
 341

342 In chronically infected mice, only a minority of parasites incorporated EdU when the  
 343 1-day protocol was used (Figure 3 – figure supplement 2), and in ~20% of infected  
 344 cells, none of the parasites were labelled (Figure 5B). A similar level of heterogeneous  
 345 incorporation was observed in skeletal muscle, another site of parasite persistence in  
 346 chronically infected C3H/HeN mice, and a tissue where parasites are often found in  
 347 large nests (Figure 3 – figure supplement 3, as example). When labelling was  
 348 extended over 3.5-days (a total of 7 injections) (Figure 3A), there was a 2.3-fold  
 349 increase in the number of labelled parasites, with approximately half of those in the  
 350 colon being EdU+ve (Figure 3B and 5C, Figure 3 – figure supplement 2). With this

351 more prolonged protocol, every infected host cell that we examined contained at least  
352 one labelled parasite (Figure 5C). However, the percentage of EdU+ve parasites  
353 within the population was still significantly lower than during the acute stage, when the  
354 1-day labelling protocol was used (Figure 3). In combination, these data indicate that  
355 during chronic infection of the colon, there is a general slowdown in the rate of parasite  
356 replication. As judged by bioluminescence *ex vivo* imaging of organs and tissues,  
357 neither the 1-day nor the 3.5-day EdU injection protocols had any detectable effect on  
358 the levels of infection or on tissue-specific parasite dissemination (Figure 3 - figure  
359 supplement 4).

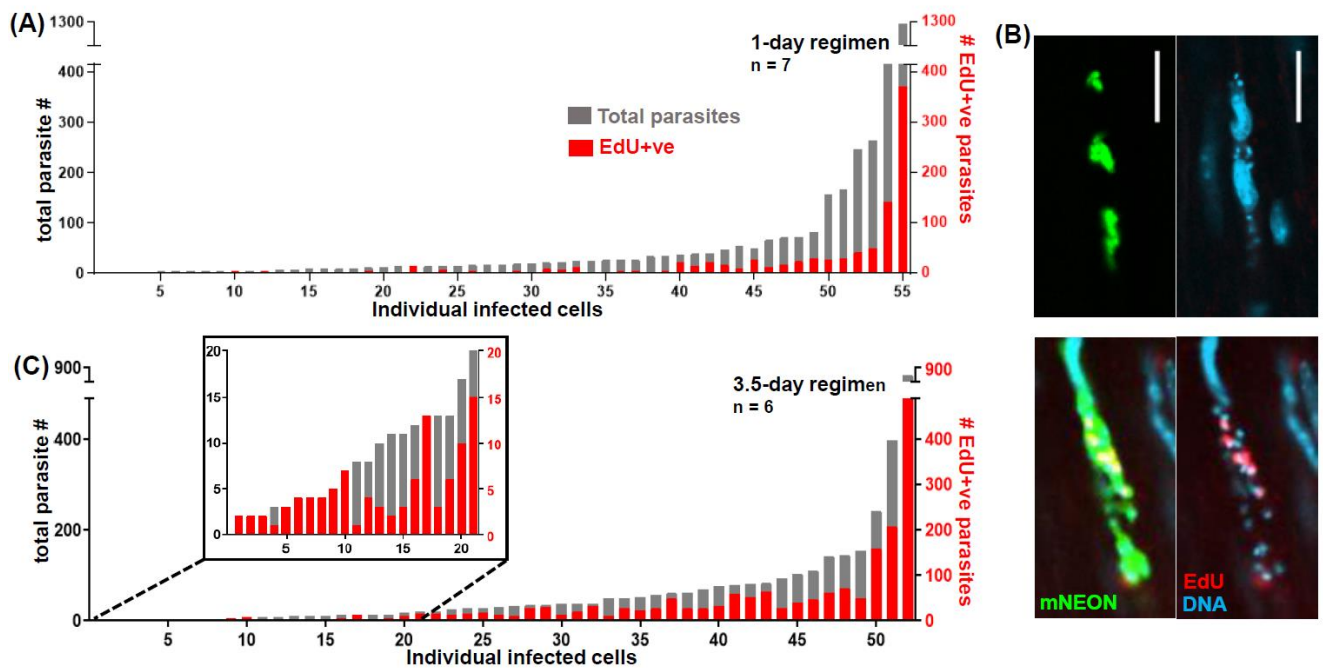

360

361 **Figure 5.** Increased chronic stage EdU incorporation by parasites with the 3.5-day regimen. (A) Level  
362 of EdU incorporation in the 55 infected cells detected in the whole mounted colonic gut walls from 7  
363 chronic stage mice treated with the 1-day labelling regimen. The total parasite content (grey) and the  
364 number that were EdU+ve (red) are indicated. (B) Upper images; an infected cell containing no EdU+ve  
365 parasites after labelling with the 1-day protocol. Lower images; an infected cell from the same colonic  
366 tissue that contained EdU+ve parasites (see also figure supplement 3). Parasites, green. (C) EdU  
367 incorporation in 52 infected cells detected in 6 chronically infected mice treated with the 3.5-day labelling  
368 protocol. Every infected cell in the colonic gut walls of these mice contained at least 1 EdU+ve parasite.  
369

370 To further investigate parasite replication during chronic stage infections, we  
371 undertook pulse chase experiments to assess the extent and stability of parasite

372 labelling 7 and 14 days after EdU injection using the 1-day pulse protocol (Figure 6A).  
373 When mice were examined by *ex vivo* bioluminescence imaging after 14 days, there  
374 had been no measurable impact on the parasite burden or tissue distribution (Figure  
375 3 - figure supplement 4). At the 7-day chase point, EdU+ve parasites were still readily  
376 detectable, although there was a 4-fold decrease in their relative abundance within the  
377 population, and only ~40% of infected cells contained any labelled parasites (Figure  
378 6C, E and F). By 14 days post-injection, out of the 87 infected cells detected in the  
379 colons of 8 mice, just 1 contained EdU+ve amastigotes (Figure 6D, E and G). Using  
380 serial Z-stacking, we established that this infected cell contained 82 parasites, 42 of  
381 which were labelled. Given this profile, the most likely explanation is that this host cell  
382 had remained infected for at least 14 days, with the parasites in a state of low  
383 proliferation. The EdU+ve parasites cannot have undergone many replication cycles  
384 during this period, since the labelling intensity was similar to that in parasites where  
385 the chase period was only 1 day. Furthermore, in dividing cells, incorporated  
386 nucleosides become undetectable after 2 to 5 generations, assuming random  
387 segregation of daughter chromosomes (Kiel *et al.* 2007; Ganusov and De Boer RJ,  
388 2013). It can be further inferred from the rarity of cells containing EdU+ve parasites  
389 (Figure 6D and G), that long-term occupancy of individual colonic smooth muscle cells  
390 by *T. cruzi* is not a common feature of chronic stage infections, even though this tissue  
391 is a site of parasite persistence. In the vast majority of cases therefore, the normal  
392 infection cycle of parasite replication, host cell lysis, and re-infection appears to  
393 continue during the chronic stage, albeit at a reduced rate. Finally, the observation of  
394 multiple labelled amastigotes within a single host cell 14 days after injection (Figure  
395 6D) demonstrates that EdU is stable once it has been incorporated into the *T. cruzi*  
396 genome and that it is not susceptible to removal by metabolic or DNA repair pathways.



397 This stability has similarities with the situation in mice, where Merkel cells labelled  
 398 during pregnancy remained EdU+ve in off-spring 9 months after birth (Wright *et al.*  
 399 2017).

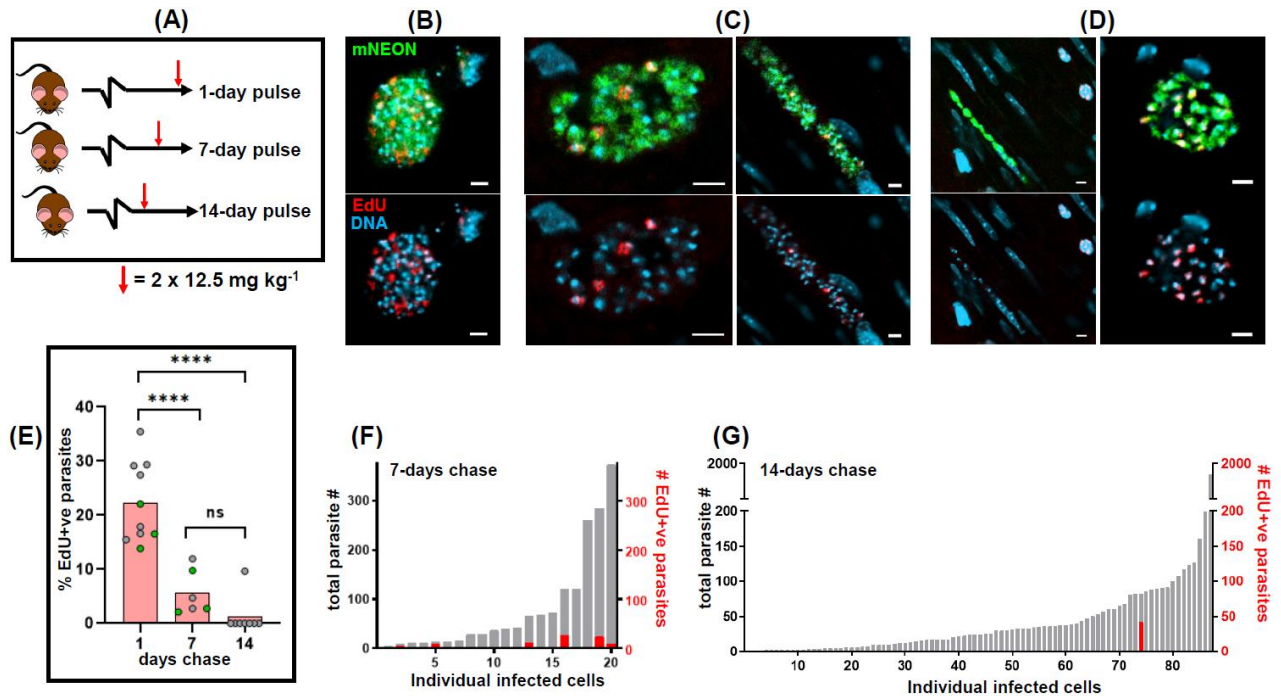

400

401 **Figure 6.** EdU pulse-chase experiments reveal that parasite occupation of individual colonic host cells  
 402 during chronic stage infections is not long-term. (A) Schematic of the pulse-chase protocol. EdU was  
 403 injected in two 12.5 mg kg<sup>-1</sup> doses, 6 hours apart (as in Figure 3A). After 1, 7, or 14 days, mice were  
 404 sacrificed, colonic tissue excised, and infected cells detected by *ex vivo* imaging and confocal  
 405 microscopy (Materials and methods). (B) Representative images of parasite EdU incorporation  
 406 following the 1-day chase regimen (see also Figure 3D). (C) EdU incorporation following a 7-day chase.  
 407 (D) Left-hand image; EdU incorporation following a 14-day chase. Typically, infected cells contained no  
 408 EdU+ve parasites. Right-hand image; the single example of an infected host containing EdU+ve  
 409 parasites after an exhaustive search of colon mounts from 8 mice. Scale bars=20 μm. (E) Mean %  
 410 EdU+ve parasites found in infected colonic cells. Each data point represents a single mouse; 1-day  
 411 chase, n=10; 7-day chase, n=6; 14-day chase, n=8. The total number of parasites detected, imaged  
 412 and designated as EdU+ve or EdU+ve in each mouse varied from 47 to 2468, with an average of 608.  
 413 The green data points indicate colons processed by standard histological sectioning, and grey data  
 414 points highlight those processed through peeling away of the mucosal layer and whole mounting of the  
 415 remaining colonic gut wall (Materials and methods). Statistical analysis of treatment conditions was  
 416 performed as described (Materials and methods); \*\*\*\*=p<0.0001. There was no significant difference  
 417 between the 7- and 14-day chase groups. (F) Percentage parasites that were EdU+ve in infected  
 418 colonic cells from mice sacrificed 7 days post EdU pulse (n=3). Grey bar indicates total parasite number  
 419 in each infected cell; red bar indicates the percentage EdU+ve. (G) Similar analysis of EdU positivity in  
 420 infected cells found in mice 14 days post EdU pulse (n=8).

421

422

423

424

## 425 Discussion

426 The report that *T. cruzi* can undergo a form of spontaneous dormancy has highlighted  
427 the possibility that the proliferation status of the parasite could have a role in long-term  
428 persistence and contribute to the high rate of treatment failure (Sánchez-Valdéz *et al.*  
429 2018). Improvements in tissue processing and imaging procedures (Ward *et al.* 2020)  
430 have allowed us to explore this further by providing a platform to investigate parasite  
431 replication in the colon of chronically infected mice, a tissue that supports long-term *T.*  
432 *cruzi* persistence at extremely low levels (Lewis *et al.* 2014). Our major finding is that  
433 during chronic infections, the proportion of intracellular parasites in S-phase is  
434 significantly lower than it is during the acute stage. In acute infections, 70% of  
435 parasites were EdU+ve after a 1-day pulse-chase, compared with 20% during the  
436 chronic stage (Figure 3 and 4, Figure 3 – figure supplement 2). This is unlikely to reflect  
437 reduced EdU uptake or bioavailability during chronic infections, as the staining  
438 intensity of individual EdU+ve parasites was similar during both stages of the disease,  
439 with the only apparent difference being the proportion of amastigotes that were  
440 positive. The most parsimonious explanation is that *T. cruzi* amastigotes proliferate at  
441 a slower rate in the chronic stage, at least in this tissue location, and were therefore  
442 less likely to be replicating their DNA during the period of EdU exposure. It is implicit  
443 from this that *T. cruzi* amastigotes have the capability of responding to environmental  
444 signals that are specific to chronic and/or acute stage disease, such as nutrient  
445 availability or indicators of the immune response. This is line with previous reports that  
446 amastigote replication and cell cycle kinetics can be subject to reversible stress-  
447 induced inhibition *in vitro* (Dumoulin and Burleigh, 2018). A response mechanism of  
448 this type could also account for the correlation between amastigote growth rate and  
449 nest size during acute infections (Figure 4).

450

451 The heterogeneous nature of labelling during the chronic stage, with many parasites  
452 being EdU-ve (Figure 3, Figure 3 – figure supplement 2), should not be interpreted as  
453 being indicative of spontaneous dormancy. Rather it provides further evidence that  
454 parasite replication within individual host cells is asynchronous (Taylor *et al.* 2020).  
455 The observation that some intracellular parasites do not incorporate EdU reflects that  
456 amastigotes exist in a range of replicative states within individual infected cells, an  
457 inference supported by the cumulative nature of EdU labelling (Figure 3, Figure 3 –  
458 figure supplement 2). There are several possible fates for parasites labelled with EdU  
459 during chronic stage infections, as outlined in Figure 7.

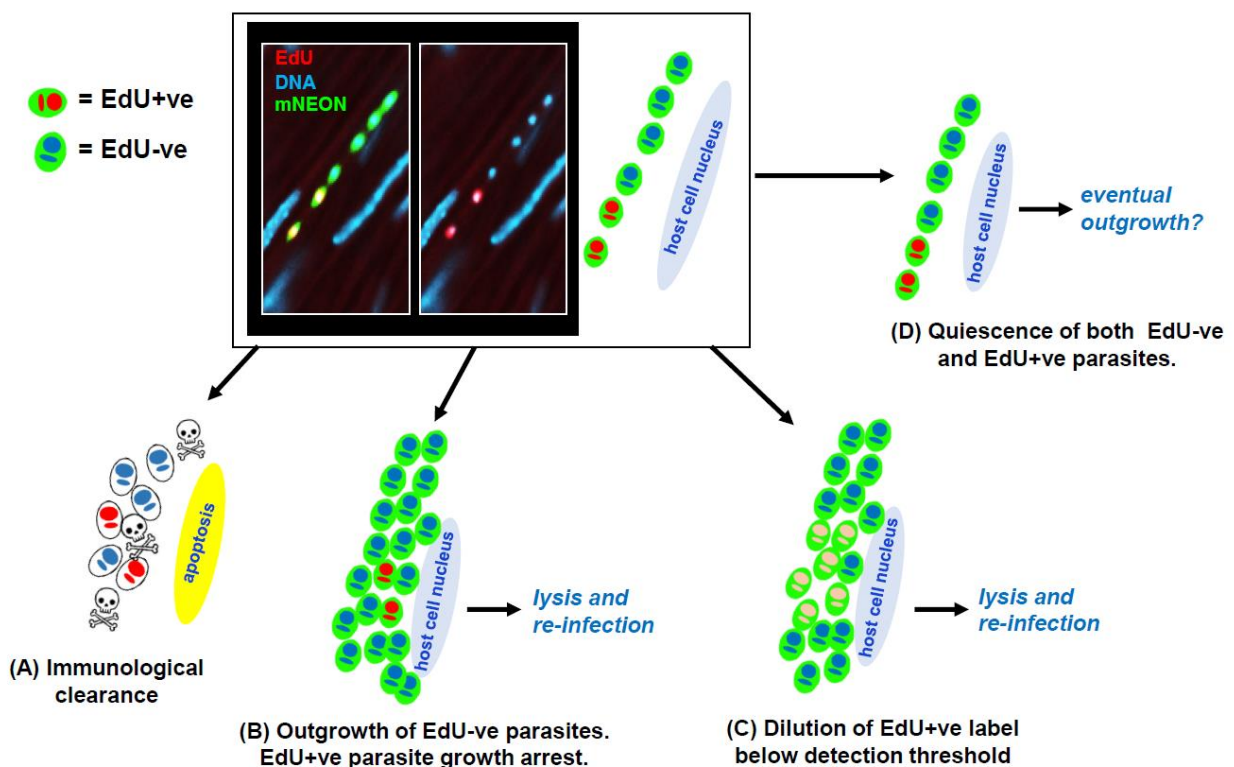

460

461 **Figure 7.** Schematic highlighting the possible fates of host cells and parasites following EdU labelling.  
462 The micrograph shows a colon smooth muscle section from a chronically infected mouse following  
463 treatment with the 1-day labelling regimen (Figure 3). EdU labelling (red) appears as yellow against the  
464 green background of parasite fluorescence. (A) Following the EdU pulse, the infected cell and parasites  
465 could be cleared by the host immune response. (B) There could be outgrowth of EdU-ve parasites in  
466 an infected cell. The EdU+ve subset, which would have been in S-phase during exposure, might enter  
467 cell cycle arrest after incorporation. (C) If EdU incorporation is below the toxicity threshold for cell cycle  
468 arrest, amastigote proliferation will lead to serial dilution of the label. (D) After EdU incorporation by a  
469 subset of parasites, all the amastigotes in the cell might enter a slow proliferative state. This appears  
470 to be a rare event (see Figure 6D and G).

471 Although incorporation of EdU into replicating DNA is widely used in proliferation  
472 studies, it can lead to a DNA damage response and cell cycle arrest, (Kohlmeier *et al.*  
473 2013; Zhao *et al.* 2013; Ligasová *et al.* 2015). With *T. cruzi*, the measurable effect of  
474 EdU toxicity is time-dependent (Sykes *et al.* 2020), and here we showed that 6 hours  
475 exposure *in vitro* at 1-2  $\mu\text{M}$  is sufficient to inhibit amastigote replication (Figure 2D).  
476 Therefore, studies on *T. cruzi* proliferation, dormancy and persistence could be  
477 confounded if EdU exposure is continuous. In the case of *in vivo* administration, EdU  
478 toxicity should be less problematic, because of the short clearance time of thymidine  
479 analogues (Mandyam *et al.* 2007). Consistent with this, we found no detectable impact  
480 of EdU exposure on parasite burden or tissue tropism in chronically infected mice  
481 (Figure 3 - figure supplement 4). In these infection experiments, where incorporation  
482 was employed as an end-point assay, providing snapshots of DNA replication within  
483 the parasite population, EdU toxicity would not be expected to compromise the  
484 outcome. This contrasts with *in vitro* experiments where EdU exposure can be  
485 continuous, resulting in interstrand cross-linking and double-strand breaks, which  
486 trigger DNA damage signalling and cell cycle arrest (Zhao *et al.* 2013). This is a  
487 ubiquitous response in all cells with DNA damage sensing machinery (Bielak-  
488 Zmijewska *et al.* 2018, Prokhorova *et al.* 2020). Spontaneous dormancy has been  
489 proposed as a mechanism that could account for parasite persistence after therapy  
490 (Sánchez-Valdes *et al.* 2018; Resende *et al.* 2020). However, in *T. cruzi*, the front-line  
491 drug benznidazole can cause mutagenesis, disruption to DNA-repair pathways, and  
492 chromosome instability (Rajão *et al.* 2014; Campos *et al.* 2017). Therefore, an  
493 alternative explanation could be that benznidazole-induced DNA damage responses  
494 trigger cell cycle arrest and a transient dormant-like state, which protects some

495 parasites from further drug-induced toxicity, ultimately leading to relapse after the  
496 successful completion of DNA repair.

497

498 Our findings do not exclude the possibility that some parasites might have the potential  
499 to enter a canonical dormant state at specific points in the life cycle. However, they  
500 more strongly suggest, that rather than being a discrete biological stage, a dormancy-  
501 like phenotype in *T. cruzi* might be better described as representing one end of the  
502 normal proliferation spectrum. The cell cycle plasticity necessary for this has already  
503 been reported in amastigotes (Dumoulin and Burleigh, 2018). Therefore, the reduced  
504 rate of *T. cruzi* replication during the chronic stage could be a phenomenon more  
505 analogous to the partial biochemical quiescence and reduced proliferation exhibited  
506 by *Leishmania* (Kloehn *et al.* 2015; Mandell and Beverley, 2017), than to the more  
507 definitive quiescent state displayed by *T. gondii* and some *Plasmodium* species  
508 (Barrett *et al.* 2019). Resolving this question and understanding the mechanisms  
509 involved has particular importance for Chagas disease drug development strategies.  
510 As described in this paper (Figures 1 and 2), there are limitations to the cell tracker  
511 dye and DNA labelling methodologies that have previously been applied to investigate  
512 *T. cruzi* proliferation and quiescence. Therefore, new approaches are urgently  
513 required.

514

515

516

517

518

519

520 **Materials and methods**

521 **Ethics statement**

522 Animal work was performed under UK Home Office project licenses (PPL 70/8207 and  
523 P9AEE04E4) and approved by the LSHTM Animal Welfare and Ethical Review Board.  
524 All procedures were conducted in accordance with the UK Animals (Scientific  
525 Procedures) Act 1986 (ASPA).

526

527 **Parasites, mice and cell lines**

528 The *T. cruzi* bioluminescent:fluorescent lines CL-Luc::mNeon or CL-Luc::Scarlet  
529 (Costa *et al.* 2018) were used throughout. Epimastigotes were grown in RPMI-1640,  
530 supplemented with 10% foetal bovine serum (FBS, BioSera), hemin (17  $\mu\text{g ml}^{-1}$ ),  
531 trypticase (4.2  $\text{mg ml}^{-1}$ ), penicillin (100 U  $\text{ml}^{-1}$ ) and streptomycin (100  $\mu\text{g ml}^{-1}$ ), at 28°C.  
532 Metacyclic trypomastigotes were generated by culturing epimastigotes to stationary  
533 phase. *In vitro* studies were performed with MA104 and Vero African green monkey  
534 kidney cell lines. *In vivo* experiments used female C3H/HeN mice, initially aged 8-12  
535 weeks, purchased from Charles Jackson (UK). Mice were maintained under specific  
536 pathogen-free conditions in individually ventilated cages. They experienced a 12-hour  
537 light/dark cycle and had access to food and water *ad libitum*.

538

539 **CellTrace *in vitro* assay**

540 *T. cruzi* trypomastigotes were isolated by centrifugation and allowed to recover for 2  
541 hours at 37°C in high-glucose DMEM medium with 10% FBS, and then labelled with  
542 the CellTrace Violet (CTV) fluorescent dye (Thermo Fisher Scientific) according to the  
543 manufacturer's protocol. Briefly,  $2 \times 10^6$  trypomastigotes were washed in PBS and then  
544 incubated for 20 minutes at 37°C in 10, 5, 2, or 1  $\mu\text{M}$  CTV, protected from light.



545 Unbound dye was quenched by the addition of 1 volume FBS and incubation for 5  
546 minutes at 37°C. After washing (x2) in fresh complete medium, trypomastigotes were  
547 used for infection. Vero cells maintained in RPMI 10% FBS were trypsinized and  
548 seeded at  $10^4$  or  $10^5$  cells per well in 24-well plates containing cover slips, or in 8 well  
549 Ibidi  $\mu$ -slides with a polymer coverslip, and allowed to attach for 6 hours before  
550 infection. Trypomastigotes were added at a multiplicity of infection of 10:1  
551 (parasite:cell) and allowed to invade overnight (16-18 hours). Cultures were washed  
552 with PBS (x3) to remove non-invading parasites, and infected cultures incubated in  
553 RPMI with 2% FCS. Coverslips were fixed at different timepoints by transfer into a  
554 plate containing 4% paraformaldehyde for 30 minutes, then stained and mounted using  
555 Vectashield® with DAPI, or with propidium iodide following RNase treatment.

556

557 Images and videos were acquired using an inverted Nikon Eclipse microscope. The  
558 slide containing the infected cells was moved along the x-y plane through a 580 nm  
559 LED illumination. Images and videos were collected using a 16-bit, 1-megapixel Pike  
560 AVT (F-100B) CCD camera set in the detector plane. An Olympus LMPlanFLN  
561 40x/1.20 objective was used to collect the exit wave leaving the specimen. Time-lapse  
562 imaging was performed by placing the chamber slide on the microscope surrounded  
563 by an environmental chamber (OKOLab cage incubator) maintaining the cells and the  
564 microscope at 37°C and 5% CO<sub>2</sub>. Video projections and Z-stack sequences were  
565 created using the deconvolution app in the Nikon imaging software.

566

### 567 ***In vitro* parasite culturing and EdU labelling**

568 Tissue culture trypomastigotes (TCTs) were derived after infecting MA104 cells with  
569 metacyclic trypomastigotes. MA104 cells were cultured in Minimum Essential Medium

570 Eagle (MEM, Sigma-Aldrich.), supplemented with 5% FBS at 37°C, in 5% CO<sub>2</sub>. 24-  
571 well plates containing cover slips were seeded with 10<sup>5</sup> cells per well and left for 48  
572 hours. After reaching 95-100% confluency, they were infected with TCTs at a  
573 multiplicity of infection (MOI) of 5:1 (parasite:host cell). 18 hours later, external  
574 parasites were removed by washing (x3), fresh supplemented MEM was added, and  
575 the infections allowed to proceed.

576

577 EdU (Sigma-Aldrich) in PBS was diluted to the appropriate concentration in  
578 supplemented MEM (legend to Figure 2). The medium was removed, and the infected  
579 monolayer washed (x2), and fresh medium including EdU added. After the appropriate  
580 incubation period, cells were washed (x3). For EdU toxicity studies, parasite growth in  
581 infected cells was assessed in 96-well plates, 3 days after EdU addition, by measuring  
582 mNeonGreen fluorescence in a FLUOstar Omega plate reader (BMG LABTECH).  
583 Background fluorescence was calculated using uninfected MA104 cells (n=6). For  
584 microscopy, cells in the 24-well plates were washed (x2) and incubated for 45 minutes  
585 in 4% paraformaldehyde diluted in PBS. Cover slips were then removed and washed  
586 (x2) in PBS. EdU incorporation was assessed using a Click-iT Plus EdU AlexaFluor  
587 555 Imaging kit (Invitrogen), as per manufacturer's instructions, followed by washing  
588 (x2) with PBS, with coverslips then mounted in Vectashield. To allow precise counting  
589 of amastigotes, cells were imaged in 3-dimensions with a Zeiss LSM880 confocal  
590 microscope, using the Image Browser overlay function to add scale bars. Images were  
591 exported as .TIF files to generate figures.

592

593 ***In vivo* infections**



594 CB17 SCID mice were infected with  $1 \times 10^4$  *T. cruzi* CL-Luc::mNeon TCTs and  
595 monitored by bioluminescence imaging (Lewis *et al.* 2015). At the peak of infection  
596 (~18 days), when bloodstream trypomastigotes were visible by microscopy, the mouse  
597 was euthanised (Taylor *et al.* 2019) and infected blood obtained by exsanguination.  
598 Trypomastigotes were washed in Dulbecco's Modified Eagle Medium, diluted to  $5 \times 10^3$   
599  $\text{ml}^{-1}$ , and CH3/HeN mice injected i.p. with  $1 \times 10^3$  trypomastigotes.

600

### 601 ***In vivo* EdU labelling**

602 The standard 1-day EdU treatment regimen involved two i.p. injections ( $12.5 \text{ mg kg}^{-1}$   
603 EdU in PBS) delivered 6 hours apart. The second injection took place 18 hours prior  
604 to sacrifice. For the 3.5-day treatment, the daily injection protocol (above) was  
605 extended for 3 days, with a final single injection on day 4, followed 4 hours later with  
606 euthanasia and necropsy. For acute stage experiments, mice were 14-16 days post-  
607 infection when EdU was administered, and for the chronic stage, mice had been  
608 infected for >100 days. Organs and tissues were subjected to *ex vivo* imaging,  
609 bioluminescent foci from skeletal muscle and the colon were excised, and processed  
610 for histology (Taylor *et al.* 2019). Where indicated, whole colons were removed from  
611 the gastrointestinal tract, pinned luminal side up, and the mucosal layer removed.  
612 Whole mounting of the entire external colonic gut wall was performed as described  
613 previously (Ward *et al.* 2020). Parasites were identified by mNeonGreen fluorescence  
614 using confocal microscopy, and carefully removed, together with  $\sim 5 \text{ mm}^2$  of  
615 surrounding tissue. Prior to a 2nd mounting, tissue pieces were processed for EdU  
616 detection by incubation overnight at  $4^\circ\text{C}$  in PBS containing 2.5% FBS and 0.5% triton-  
617 X (Sigma-Aldrich) and then washed in PBS (x2) (Taylor *et al.* 2020).

618

## 619 **Statistics**

620 All statistical analyses were performed in GraphPad PRISM v8.0 and STATA v16.0.,  
621 and the data expressed as the mean  $\pm$  standard deviation of mean (SD), unless  
622 otherwise stated. *In vitro* EdU toxicity was calculated as % growth relative to non-  
623 treated controls. The data were fitted with a sigmoidal function with variable slope and  
624 the absolute IC<sub>50</sub> value calculated by solving the function for X when Y= 50%. All data  
625 were tested for normality and homogeneity of variance using Shapiro-Wilk's and  
626 Levene's tests, respectively. Statistical comparisons between samples to analyse *in*  
627 *situ* EdU incorporation were performed using one-way ANOVA with post-hoc Tukey's  
628 test for multiple comparisons. Data sets were analysed by non-parametric tests when  
629 variances were not homogenous. The % EdU incorporation in colon tissue sections  
630 vs. whole mount were compared using the Wilcoxon signed-rank test. The Kruskal-  
631 Wallis test was performed on the pulse-chase data. Statistical significance was  
632 accepted where  $p \leq 0.05$  (\*= $p \leq 0.05$ , \*\*= $p \leq 0.01$ , \*\*\*= $p \leq 0.001$ , \*\*\*\*= $p \leq 0.0001$ ).

633

634

## 635 **Acknowledgements**

636 This work was supported by UK Medical Research Council (MRC) Grant  
637 MR/T015969/1 to JMK and MRC LID (DTP) Studentship MR/N013638/1 to AIW.

638

639

## 640 **Competing interests**

641 The authors have no competing interests relating to this work.

642

643 **Figure 1.** CellTrace Violet (CTV) reduces *T. cruzi* infectivity and inhibits intracellular  
644 proliferation. (A) *T. cruzi* CL-Luc::Scarlet trypomastigotes were incubated with either 5  
645 or 10  $\mu$ M CTV for 20 minutes and used to infect Vero cell monolayers at a multiplicity  
646 of infection of 10:1 (Materials and methods). 18 hours later, infection efficiency was  
647 determined by inspecting a total of 2,203 (control), 3781 (5  $\mu$ M), and 3,840 (10  $\mu$ M)  
648 Vero cells. At least 300 of these were infected in each case. Each data point  
649 corresponds to a randomly acquired image and represents the mean percentage of  
650 cells infected. Differences between columns were analysed using a parametric one-  
651 way ANOVA with Tukey's post hoc pair wise comparisons. \*\*\*\*= $p \leq 0.0001$ . (B) Vero  
652 cells infected with CTV-ve or CTV+ve trypomastigotes (as above) were incubated for  
653 the time periods indicated. The numbers of amastigotes per infected cell were then  
654 determined by analysing >300 infected cells per treatment. Error bars represent the  
655 standard deviation from the mean. Data were analysed using a Wilcoxon rank sum  
656 test. (C) Images of Vero cells 36 hours after infection with CTV-ve or CTV+ve  
657 trypomastigotes. Red, fluorescent *T. cruzi* amastigotes. Fluorescent parasites  
658 containing the CTV tracer dye appear as purple on a red fluorescent background. Size  
659 bars=20  $\mu$ M (D) Images of Vero cells 5 days after infection with trypomastigotes that  
660 had been incubated with various concentrations of CTV, as indicated. Blue,  
661 intracellular vesicles containing CVT. See also supplementary Video 1. Size bars=20  
662  $\mu$ M, except where indicated; \*=50  $\mu$ M.

663

664 **Figure 2.** EdU incorporation by *T. cruzi* amastigotes *in vitro* is rapid, heterogeneous  
665 within the population, and can inhibit parasite growth. (A) *T. cruzi* CL-Luc::Neon  
666 trypomastigotes were used to infect MA104 cells at an MOI of 5:1 (Materials and  
667 methods). 2 days later, cultures were pulsed for 10 minutes with EdU (50  $\mu$ M) and

668 then examined by confocal microscopy. The image shows adjacent infected cells  
669 where in one instance, all 8 amastigotes are EdU+ve, whereas in the other, 2/8 are  
670 EdU-ve (indicated by white arrowhead). N, host cell nucleus. (B) EdU labelling of  
671 amastigotes after 1 hour exposure (40  $\mu$ M). kDNA, kinetoplast DNA; n, parasite  
672 nucleus. (C) EdU labelling of amastigotes after 6 hours exposure (10  $\mu$ M). Scale  
673 bars=10  $\mu$ m in all cases. (D) MA104 cells were infected with trypomastigotes, and 2  
674 days later, the cultures were pulsed for 6 hours with EdU at a range of concentrations,  
675 and then washed thoroughly. After a further 3 days incubation, amastigote growth was  
676 determined by assessing expression of the mNeonGreen reporter (Materials and  
677 methods). The inhibition curve was plotted using PRISM graphpad to establish the  
678 concentration of EdU that conferred 50% growth inhibition compared to untreated  
679 controls. Data were derived from 5 replicates ( $CI_{95}$  0.98  $\mu$ M-4.83  $\mu$ M).

680

681 **Figure 3.** Intracellular *T. cruzi* replication, as inferred by EdU incorporation, is slower  
682 in the chronic stage than during acute infections. (A) Schematic showing experimental  
683 outline. C3H/HeN mice infected with *T. cruzi* CL-Luc::Neon were injected with EdU as  
684 indicated during the acute (15 days post-infection; dpi) or chronic stage (>100 dpi).  
685 Larger red arrows indicate 2 i.p. injections separated by 6 hours; smaller red arrow  
686 indicates a single i.p. injection on day 4. (B) Percentage of parasites that were EdU+ve  
687 under each treatment regimen. Colonic tissue was extracted from mice *post-mortem*,  
688 18 hours after the second injection (1-day treatment) or 4 hours after the final injection  
689 (3.5-days treatment), and infected cells detected by *ex vivo* imaging and confocal  
690 microscopy (Materials and methods) (Figure 3 - figure supplement 1) (Ward *et al.*  
691 2020). Each data point represents a single mouse. Red data points indicate mice aged  
692 ~150 days at the start of acute infection, and act as age matched controls for chronic

693 stage mice. In the chronically infected mice, green data points indicate colons  
694 processed by standard histological sectioning, and grey points highlight those  
695 processed through peeling away of the mucosal layer and whole mounting the  
696 remaining colonic gut wall (Materials and methods). No significant differences were  
697 observed in the % EdU+ve parasites in colonic sections processed by each method  
698 (Wilcoxon rank sum test). For comparison of treatment conditions, statistical analysis  
699 was performed as described (Materials and methods); \*\*\*\*= $p \leq 0.0001$  and \*\*= $p \leq 0.01$ .  
700 (C) Representative images of infected colonic muscle cells from an acute stage  
701 mouse. Labelling: parasites, green; DNA, blue (DAPI staining); EdU, red. EdU labelling  
702 on a green background appears yellow. (D and E) Images of infected colonic muscle  
703 tissue from chronically infected mice after EdU labelling using the 1-day and 3.5-day  
704 regimen, respectively (see also Figure 3 - figure supplement 2). Scale bars=20  $\mu\text{m}$ ,  
705 except where indicated; \*=10  $\mu\text{m}$ .

706

707 **Figure 4.** The inferred parasite replication rate is higher during the acute stage and  
708 correlates positively with nest size at this phase of the infection. (A) The number of  
709 infected cells (nests) detected in colonic gut wall tissue from mice in the acute (n=5)  
710 and chronic (n=7) stage, and the number of parasites found in each category. Tissue  
711 was processed using the colon peeling procedure (Materials and methods). (B)  
712 Percentage EdU+ve parasites in infected cells during acute and chronic infections in  
713 relation to nest size. (C) Relating nest size to the % EdU+ve parasites during acute  
714 stage infection. Each point corresponds to a specific nest size (x-axis), and the  
715 corresponding %EdU+ve mean percentage value across all animals (y-axis).

716

717 **Figure 5.** Increased chronic stage EdU incorporation by parasites with the 3.5-day  
718 regimen. (A) Level of EdU incorporation in the 55 infected cells detected in the whole  
719 mounted colonic gut walls from 7 chronic stage mice treated with the 1-day labelling  
720 regimen. The total parasite content (grey) and the number that were EdU+ve (red) are  
721 indicated. (B) Upper images; an infected cell containing no EdU+ve parasites after  
722 labelling with the 1-day protocol. Lower images; an infected cell from the same colonic  
723 tissue that contained EdU+ve parasites (see also figure supplement 3). Parasites,  
724 green. (C) EdU incorporation in 52 infected cells detected in 6 chronically infected  
725 mice treated with the 3.5-day labelling protocol. Every infected cell in the colonic gut  
726 walls of these mice contained at least 1 EdU+ve parasite.

727

728 **Figure 6.** EdU pulse-chase experiments reveal that parasite occupation of individual  
729 colonic host cells during chronic stage infections is not long-term. (A) Schematic of the  
730 pulse-chase protocol. EdU was injected in two 12.5 mg kg<sup>-1</sup> doses, 6 hours apart (as  
731 in Figure 3A). After 1, 7, or 14 days, mice were sacrificed, colonic tissue excised, and  
732 infected cells detected by *ex vivo* imaging and confocal microscopy (Materials and  
733 methods). (B) Representative images of parasite EdU incorporation following the 1-  
734 day chase regimen (see also Figure 3D). (C) EdU incorporation following a 7-day  
735 chase. (D) Left-hand image; EdU incorporation following a 14-day chase. Typically,  
736 infected cells contained no EdU+ve parasites. Right-hand image; the single example  
737 of an infected host containing EdU+ve parasites after an exhaustive search of colon  
738 mounts from 8 mice. Scale bars=20 μm. (E) Mean % EdU+ve parasites found in  
739 infected colonic cells. Each data point represents a single mouse; 1-day chase, n=10;  
740 7-day chase, n=6; 14-day chase, n=8. The total number of parasites detected, imaged  
741 and designated as EdU+ve or EdU-ve in each mouse varied from 47 to 2468, with an

742 average of 608. The green data points indicate colons processed by standard  
743 histological sectioning, and grey data points highlight those processed through peeling  
744 away of the mucosal layer and whole mounting of the remaining colonic gut wall  
745 (Materials and methods). Statistical analysis of treatment conditions was performed  
746 as described (Materials and methods); \*\*\*\*= $p \leq 0.0001$ . There was no significant  
747 difference between the 7- and 14-day chase groups. (F) Percentage parasites that  
748 were EdU+ve in infected colonic cells from mice sacrificed 7 days post EdU pulse  
749 (n=3). Grey bar indicates total parasite number in each infected cell; red bar indicates  
750 the percentage EdU+ve. (G) Similar analysis of EdU positivity in infected cells found  
751 in mice 14 days post EdU pulse (n=8).

752

753 **Figure 7.** Schematic highlighting the possible fates of host cells and parasites  
754 following EdU labelling. The micrograph shows a colon smooth muscle section from a  
755 chronically infected mouse following treatment with the 1-day labelling regimen (Figure  
756 3). EdU labelling (red) appears as yellow against the green background of parasite  
757 fluorescence. (A) Following the EdU pulse, the infected cell and parasites could be  
758 cleared by the host immune response. (B) There could be outgrowth of EdU-ve  
759 parasites in an infected cell. The EdU+ve subset, which would have been in S-phase  
760 during exposure, might enter cell cycle arrest after incorporation. (C) If EdU  
761 incorporation is below the toxicity threshold for cell cycle arrest, amastigote  
762 proliferation will lead to serial dilution of the label. (D) After EdU incorporation by a  
763 subset of parasites, all the amastigotes in the cell might enter a slow proliferative state.  
764 This appears to be a rare event (see Figure 6D and G).

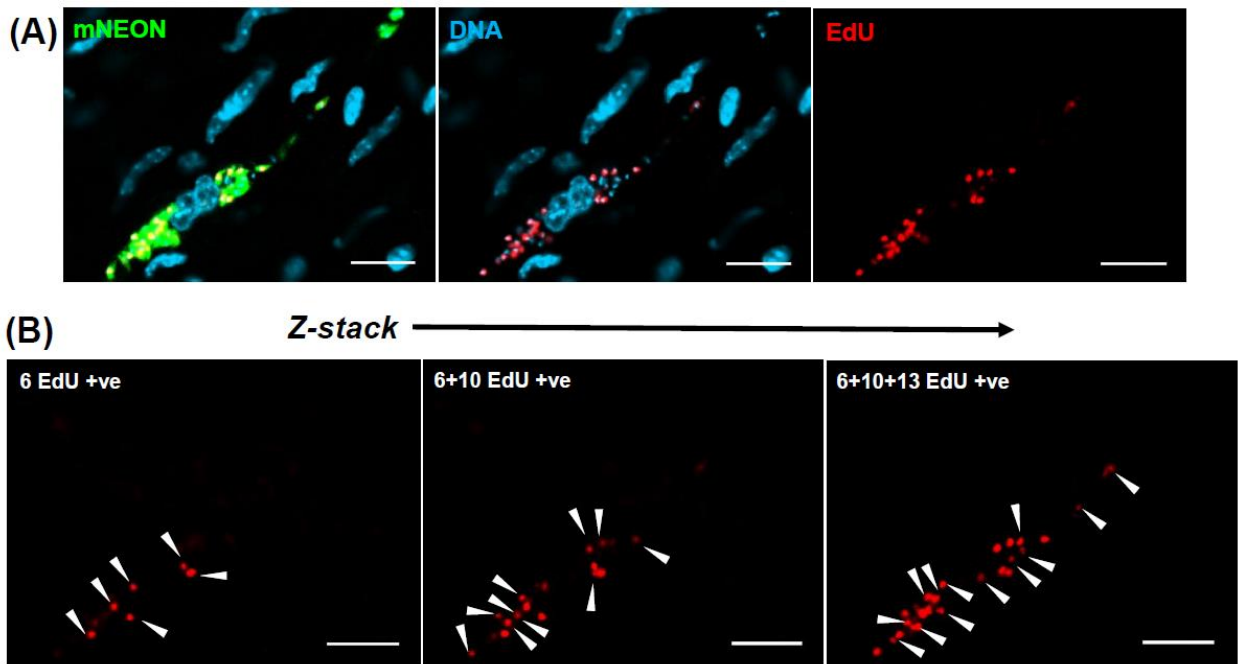

765

766 **Figure 3 – figure supplement 1.** Determination of parasite numbers and EdU  
767 incorporation status in infected mouse cells using 3-dimensional confocal imaging. (A)  
768 *T. cruzi* infected cell in the colonic gut wall of a chronic stage C3H/HeN mouse,  
769 following treatment using the standard 3.5-day EdU labelling protocol (Figure 3A). All  
770 scale bars=20µm. (B) Assessment of EdU+ve parasites using a series of Z-stacked  
771 image slices from across the infected cell. 29 EdU+ve parasites were detected. The  
772 total number of parasites was determined in the same manner by visualising DAPI  
773 staining.

774

775

776

777

778

779

780



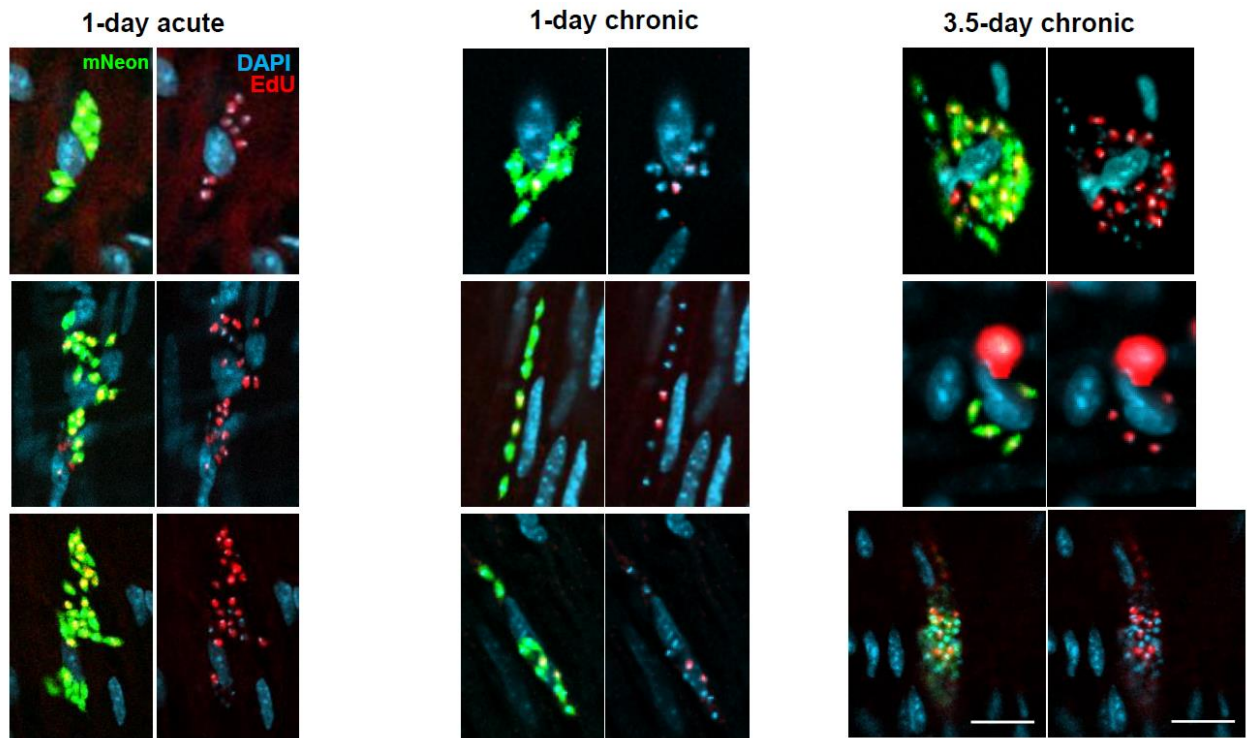

781

782 **Figure 3 - figure supplement 2.** Further images demonstrating that, inferred from  
783 EdU incorporation, *T. cruzi* replication is slower in the chronic stage than in the acute  
784 (see also Figure 3). C3H/HeN mice infected with *T. cruzi* CL-Luc::Neon were injected  
785 with EdU during the acute or chronic stage. Colonic tissue was extracted from mice  
786 18 hours after the second injection with 12.5 mg kg<sup>-1</sup> EdU (1-day treatment, acute and  
787 chronic stage) or 4 hours after the final injection (3.5-days treatment, chronic stage),  
788 and infected cells detected by *ex vivo* imaging and confocal microscopy (Materials and  
789 methods). Labelling: parasites, green; DNA, blue (DAPI staining); EdU, red. EdU  
790 labelling on a green background appears yellow. For reference, scale bars=20 μm.  
791 These images form part of the data set collated to produce Figure 3B.

792

793

794

795

796

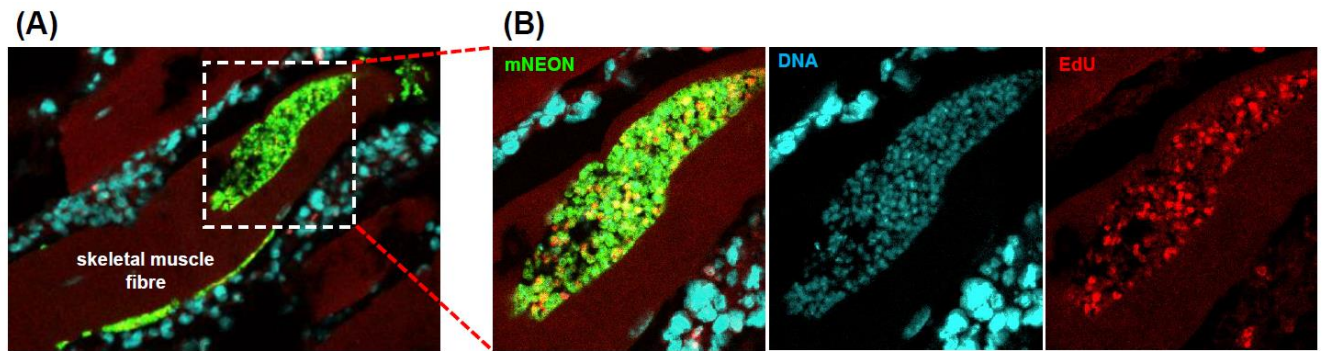

797

798 **Figure 3 - figure supplement 3.** EdU incorporation by parasites in skeletal muscle

799 during a chronic stage infection. (A) C3H/HeN mice, chronically infected with *T. cruzi*

800 CL-Luc::Neon, were injected twice with EdU (12.5 mg kg<sup>-1</sup>; 6 hours apart). Skeletal

801 muscle was excised 18 hours later and infected cells detected by *ex vivo* imaging and

802 confocal microscopy (Materials and methods). (B) Enlarged images of nest showing

803 fluorescent parasites (green), DNA staining (blue), and EdU incorporation (red).

804

805

806

807

808

809

810

811

812

813

814

815

816

817

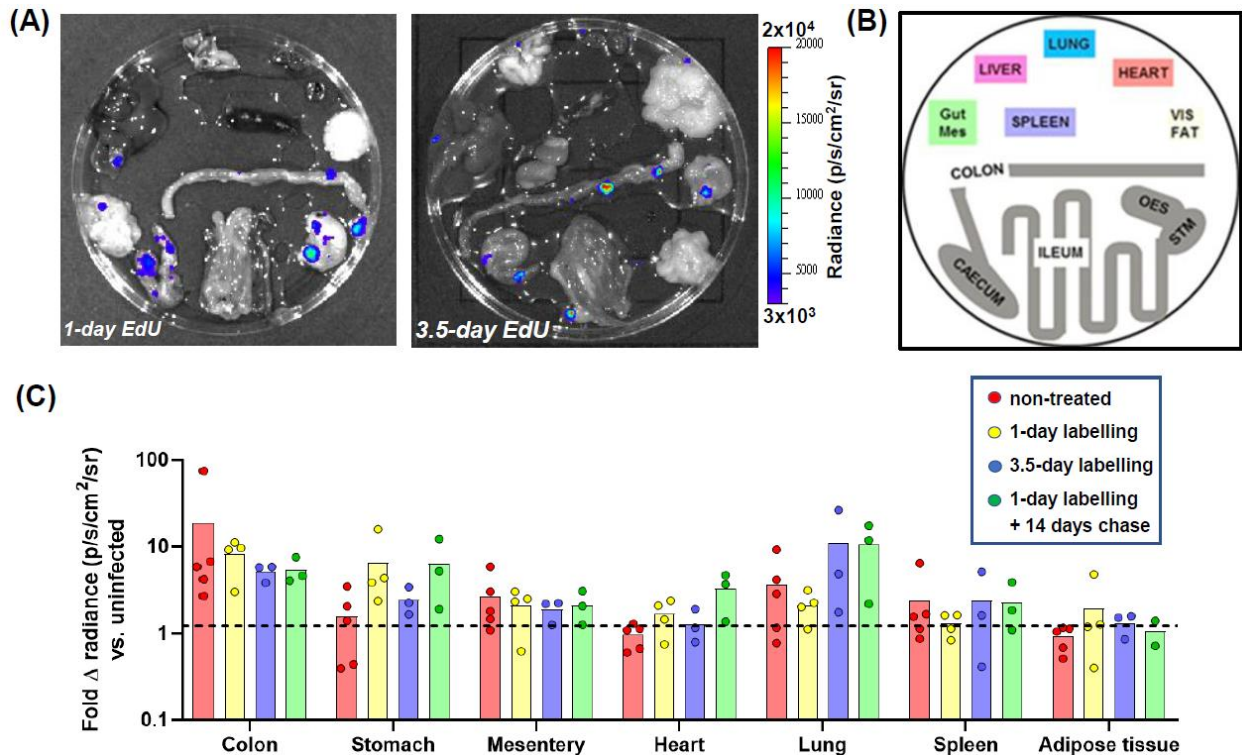

818

819 **Figure 3 - supplement 4.** (A) *Ex vivo* bioluminescence imaging of organs and tissues

820 from a C3H/HeN mouse chronically infected with *T. cruzi* CL-Luc::Neon, sacrificed

821 after EdU labelling using the 1-day and 3.5-day protocol (Figure 3A). (B) Schematic

822 showing the arrangement of organs. (C) Comparison of the fold increase in radiance

823 (p/s/cm<sup>2</sup>/sr) above background associated with organs and tissues from chronically

824 infected mice subjected to 1-day EdU labelling (n=4), 3.5-day EdU labelling (n=3), and

825 1-day EdU labelling, followed by a 14-day chase (n=3) (as in Figures 3 and 6). The

826 dashed line indicates 2xSD above the background established from uninfected mice

827 (n=4).

828

829

830

831

832

833

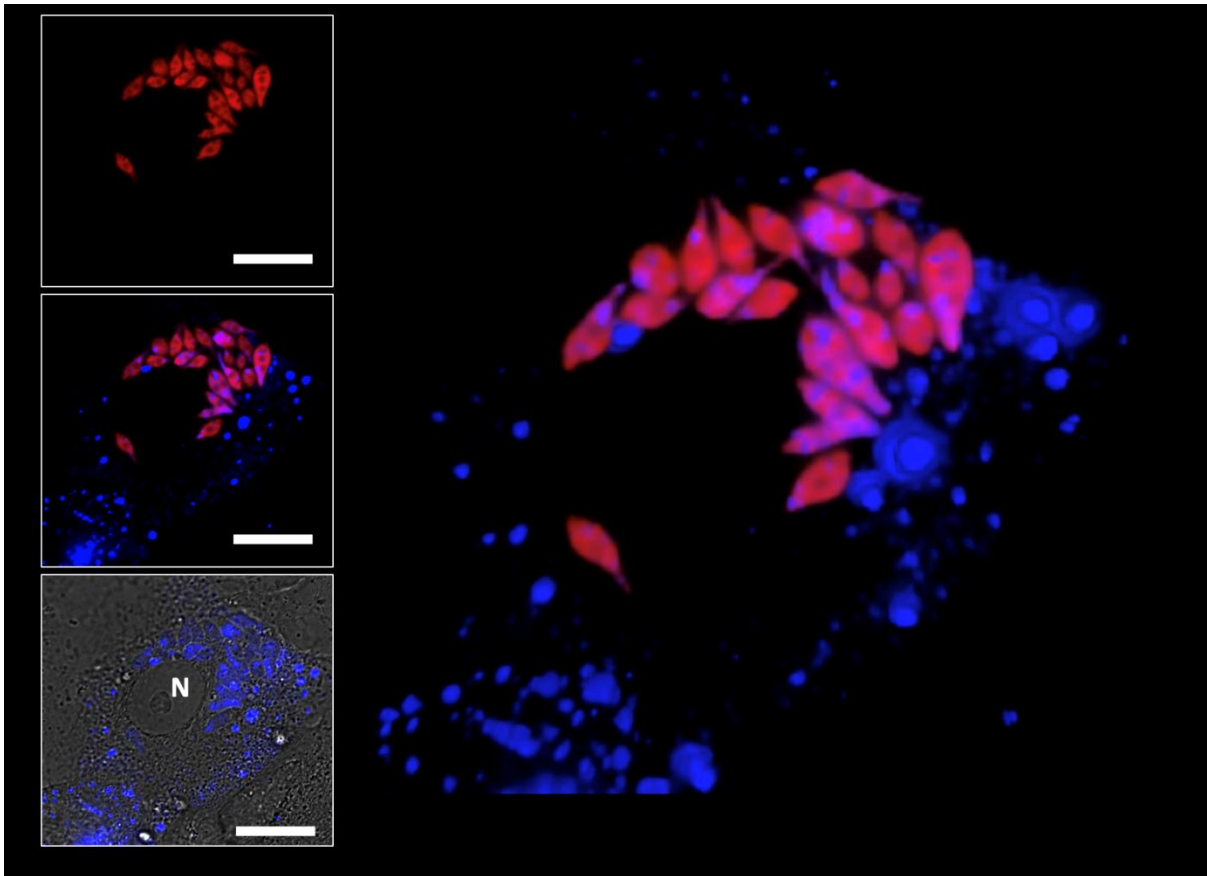

834

835

836 **Supplementary Video 1.** 3-D video projection and rotation after Z-stack capture of a  
837 Vero cell 5 days post-infection with *T. cruzi* CLBr-Luc::Scarlet (red) (see also Figure  
838 1D). Infective trypomastigotes had been pre-incubated with 10  $\mu$ M CTV (Materials and  
839 methods). The asynchronous parasite population contains amastigotes displaying  
840 different sizes and shapes suggesting variability in their cell and/or developmental  
841 cycles. Within individual parasites, there was considerable heterogeneity in the  
842 intensity and location of CTV-staining. Similarly, in the host cell, CTV is widely  
843 dispersed (blue), frequently sequestered in vesicle-like structures that can be mistaken  
844 for amastigotes unless co-localising red fluorescence is confirmed. N=host cell  
845 nucleus. Size bars=20  $\mu$ M. Video downloaded as separate file.

846

847

848 **References**

- 849 **Barrett MP**, Kyle DE, Sibley LD, Radke JB, Tarleton RL. 2019. Protozoan persister-  
850 like cells and drug treatment failure. *Nat Rev Microbiol* 17:607-620. DOI:  
851 10.1038/s41579-019-0238-x.
- 852 **Bielak-Zmijewska A**, Mosieniak G, Sikora E. 2018. Is DNA damage indispensable for  
853 stress-induced senescence? *Mech Ageing Dev* 170:13-21. DOI:  
854 10.1016/j.mad.2017.08.004.
- 855 **Bonney KM**, Luthringer DJ, Kim SA, Garg NJ, Engman DM. 2019. Pathology and  
856 pathogenesis of Chagas heart disease. *Annu Rev Pathol* 14:421-447. DOI:  
857 10.1146/annurev-pathol-020117-043711.
- 858 **Campos MC**, Phelan J, Francisco AF, Taylor MC, Lewis MD, Pain A, Clark TG, Kelly  
859 JM. 2017. Genome-wide mutagenesis and multi-drug resistance in American  
860 trypanosomes induced by the front-line drug benznidazole. *Sci Rep* 7:14407. DOI:  
861 10.1038/s41598-017-14986-6.
- 862 **Cardillo F**, de Pinho RT, Antas PR, Mengel J. 2015. Immunity and immune modulation  
863 in *Trypanosoma cruzi* infection. *Pathog Dis* 73:ftv082. DOI: 10.1093/femspd/ftv082.
- 864 **Costa FC**, Francisco AF, Jayawardhana S, Calderano SG, Lewis MD, Olmo F,  
865 Beneke T, Gluenz E, Sunter J, Dean S, Kelly JM, Taylor MC. 2018. Expanding the  
866 toolbox for *Trypanosoma cruzi*: A parasite line incorporating a bioluminescence-  
867 fluorescence dual reporter and streamlined CRISPR/Cas9 functionality for rapid *in vivo*  
868 localisation and phenotyping. *PLoS Negl Trop Dis* 12:e0006388. DOI:  
869 10.1371/journal.pntd.0006388.
- 870 **Dodd CE**, Schlesinger LS. 2017. New concepts in understanding latent tuberculosis.  
871 *Curr Opin Infect Dis* 30:316-321. DOI: 10.1097/QCO.0000000000000367.



- 872 **Dumoulin PC**, Burleigh BA. 2018. Stress-induced proliferation and cell cycle plasticity  
873 of intracellular *Trypanosoma cruzi* amastigotes. *mBio* 9:e00673-18. DOI:  
874 10.1128/mBio.00673-18.
- 875 **Filby A**, Begum J, Jalal M, Day W. 2015. Appraising the suitability of succinimidyl and  
876 lipophilic fluorescent dyes to track proliferation in non-quiescent cells by dye dilution.  
877 *Methods* 82:29-37. DOI: 10.1016/j.ymeth.2015.02.016.
- 878 **Fisher RA**, Gollan B, Helaine S. 2017. Persistent bacterial infections and persister  
879 cells. *Nat Rev Microbiol* 15:453-464. DOI: 10.1038/nrmicro.2017.42.
- 880 **Francisco AF**, Jayawardhana S, Lewis MD, Taylor MC, Kelly JM. 2017. Biological  
881 factors that impinge on Chagas disease drug development. *Parasitology* 144:1871-  
882 1880. DOI: 10.1017/S0031182017001469.
- 883 **Ganusov VV**, De Boer RJ. 2013. A mechanistic model for bromodeoxyuridine dilution  
884 naturally explains labelling data of self-renewing T cell populations. *J R Soc Interface*  
885 10:20120617. DOI: 10.1098/rsif.2012.0617.
- 886 **Gaspar L**, Moraes CB, Freitas-Junior LH, Ferrari S, Costantino L, Costi MP, Coron  
887 RP, Smith TK, Siqueira-Neto JL, McKerrow JH, Cordeiro-da-Silva A. 2015. Current  
888 and future chemotherapy for Chagas disease. *Curr Med Chem* 22:4293-4312. DOI:  
889 10.2174/0929867322666151015120804.
- 890 **Gollan B**, Grabe G, Michaux C, Helaine S. 2019. Bacterial persisters and infection:  
891 past, present, and progressing. *Ann Rev Microbiol* 73:359-385. DOI:  
892 10.1146/annurev-micro-020518-115650.
- 893 **Kiel MJ**, He S, Ashkenazi R, Gentry SN, Teta M, Kushner JA, Jackson TL, Morrison  
894 SJ. 2007. Haematopoietic stem cells do not asymmetrically segregate chromosomes  
895 or retain BrdU. *Nature* 449:238-242. DOI: 10.1038/nature06115.

- 896 **Kloehn J**, Saunders EC, O'Callaghan S, Dagley MJ, McConville MJ. 2015.  
897 Characterization of metabolically quiescent *Leishmania* parasites in murine lesions  
898 using heavy water labeling. *PLoS Pathog* 11:e1004683. DOI:  
899 10.1371/journal.ppat.1004683.
- 900 **Kohlmeier F**, Maya-Mendoza A, Jackson DA. 2013. EdU induces DNA damage  
901 response and cell death in mESC in culture. *Chromosome Res* 21:87-100. DOI:  
902 10.1007/s10577-013-9340-5.
- 903 **Krishnan A**, Kloehn J, Lunghi M, Chiappino-Pepe A, Waldman BS, Nicolas D, Varesio  
904 E, Hehl A, Lourido S, Hatzimanikatis V, Soldati-Favre D. 2020. Functional and  
905 computational genomics reveal unprecedented flexibility in stage-specific *Toxoplasma*  
906 metabolism. *Cell Host Microbe* 27:290-306. DOI: 10.1016/j.chom.2020.01.002.
- 907 **Lacy Kamm J**, Parlane NA, Riley CB, Gee EK, Roberts JM, McIlwraith CW. 2020.  
908 CellTrace Violet™ inhibits equine lymphocyte proliferation. *Vet Immunol*  
909 *Immunopathol* 223:110037. DOI: 10.1016/j.vetimm.2020.110037.
- 910 **Lanz MC**, Dibitto D, Smolka MB. 2019. DNA damage kinase signaling: Checkpoint  
911 and repair at 30 years. *EMBO J*. 38:e101801. DOI: 10.15252/embj.2019101801.
- 912 **Lewis MD**, Fortes Francisco A, Taylor MC, Burrell-Saward H, McLatchie AP, Miles  
913 MA, Kelly JM. 2014. Bioluminescence imaging of chronic *Trypanosoma cruzi*  
914 infections reveals tissue-specific parasite dynamics and heart disease in the absence  
915 of locally persistent infection. *Cell Microbiol* 16:1285-1300. DOI: 10.1111/cmi.12297.
- 916 **Lewis MD**, Fortes Francisco A, Taylor MC, Kelly JM. 2015. A new experimental model  
917 for assessing drug efficacy against *Trypanosoma cruzi* infection based on highly  
918 sensitive *in vivo* imaging. *J Biomol Screening* 20:36-43. DOI:  
919 10.1177/1087057114552623.

- 920 **Lewis MD**, Fortes Francisco A, Taylor MC, Jayawardhana S, Kelly JM. 2016. Host  
921 and parasite genetics shape a link between *Trypanosoma cruzi* infection dynamics  
922 and chronic cardiomyopathy. *Cell Microbiol* 18:1429-1443. DOI: 10.1111/cmi.12584.
- 923 **Ligasová A**, Strunin D, Friedecký D, Adam T, Koberna K. 2015. A fatal combination:  
924 a thymidylate synthase inhibitor with DNA damaging activity. *PLoS One* 10:e0117459.  
925 DOI: 10.1371/journal.pone.0117459.
- 926 **Mandal S**, Njikan S, Kumar A, Early JV, Parish T. 2019. The relevance of persisters  
927 in tuberculosis drug discovery. *Microbiology* 165:492-499. DOI:  
928 10.1099/mic.0.000760.
- 929 **Mandell MA**, Beverley SM. 2017. Continual renewal and replication of persistent  
930 Leishmania major parasites in concomitantly immune hosts. *Proc Natl Acad Sci USA*  
931 114:E801–E810. DOI: 10.1073/pnas.1619265114.
- 932 **Mandyam CD**, Harburg GC, Eisch AJ. 2007. Determination of key aspects of  
933 precursor cell proliferation, cell cycle length and kinetics in the adult mouse  
934 subgranular zone. *Neuroscience* 146:108–122. DOI:  
935 10.1016/j.neuroscience.2006.12.064
- 936 **Martinez SJ**, Romano PS, Engman DM. 2020. Precision health for Chagas disease:  
937 Integrating parasite and host factors to predict outcome of infection and response to  
938 therapy. *Front Cell Infect Microbiol* 10:210. DOI: 10.3389/fcimb.2020.00210.
- 939 **Pack AD**, Collins MH, Rosenberg CS, Tarleton RL. 2018. Highly competent, non-  
940 exhausted CD8+ T cells continue to tightly control pathogen load throughout chronic  
941 *Trypanosoma cruzi* infection. *PLoS Pathog* 14:e1007410. DOI:  
942 10.1371/journal.ppat.1007410.
- 943 **Pereira PD**, Serra-Caetano A, Cabrita M, Bekman E, Braga J, Rino J, Santos R, Filipe  
944 PL, Sousa AE, Ferreira JA. (2017) Quantification of cell cycle kinetics by EdU (5-



- 945 ethynyl-2'-deoxyuridine)-coupled-fluorescence-intensity analysis. *Oncotarget*  
946 8:40514-40532. DOI: 10.18632/oncotarget.17121.
- 947 **Pontes MH**, Groisman EA. 2020. A physiological basis for nonheritable antibiotic  
948 resistance. *mBio* 11:e00817-20. DOI: 10.1128/mBio.00817-20.
- 949 **Prokhorova EA**, Egorshina AY, Zhivotovsky B, Kopeina GS. 2020. The DNA-damage  
950 response and nuclear events as regulators of nonapoptotic forms of cell death  
951 *Oncogene* 39:1-16. DOI: 10.1038/s41388-019-0980-6.
- 952 **Rajão MA**, Furtado C, Alves CL, Passos-Silva DG, de Moura MB, Schamber-Reis BL,  
953 Kunrath-Lima M, Zuma AA, Vieira-da-Rocha JP, Garcia JB, Mendes IC, Pena SD,  
954 Macedo AM, Franco GR, de Souza-Pinto NC, de Medeiros MH, Cruz AK, Motta MC,  
955 Teixeira SM, Machado CR. 2014. Unveiling benznidazole's mechanism of action  
956 through overexpression of DNA repair proteins in *Trypanosoma cruzi*. *Environ Mol*  
957 *Mutagen* 55:309-321. DOI: 10.1002/em.21839.
- 958 **Resende BC**, Oliveira ACS, Guañabens ACP, Repolês BM, Santana V, Hiraiwa PM,  
959 Pena SDJ, Franco GR, Macedo AM, Tahara EB, Fragoso SP, Andrade LO, Machado  
960 CR. 2020. The influence of recombinational processes to induce dormancy in  
961 *Trypanosoma cruzi*. *Front Cell Infect Microbiol* 10:5. DOI: 10.3389/fcimb.2020.00005.
- 962 **Sánchez-Valdéz FJ**, Padilla A, Wang W, Orr D, Tarleton RL. 2018. Spontaneous  
963 dormancy protects *Trypanosoma cruzi* during extended drug exposure. *Elife*  
964 7:e34039. DOI: 10.7554/eLife.34039.
- 965 **Silvester E**, McWilliam KR, Matthews KR. 2017. The cytological events and molecular  
966 control of life cycle development of *Trypanosoma brucei* in the mammalian  
967 bloodstream. *Pathogens* 6:29. DOI: 10.3390/pathogens6030029.
- 968 **Sykes ML**, Hilko DH, Kung LI, Poulsen SA, Avery VM. 2020. Investigation of  
969 pyrimidine nucleoside analogues as chemical probes to assess compound effects on

970 the proliferation of *Trypanosoma cruzi* intracellular parasites. *PLoS Negl Trop Dis*  
971 14:e0008068. DOI: 10.1371/journal.pntd.0008068.

972 **Tarleton RL**. 2015. CD8+ T cells in *Trypanosoma cruzi* infection. *Semin Immunopath*  
973 37:233-238. DOI: 10.1007/s00281-015-0481-9.

974 **Taylor MC**, Francisco AF, Jayawardhana S, Mann GS, Ward A, Olmo F, Lewis MD,  
975 Kelly JM. 2019. Exploiting genetically modified dual-reporter strains to monitor  
976 experimental *Trypanosoma cruzi* infections and host:parasite interactions. Karina  
977 Andrea Go´mez and Carlos Andres Buscaglia (eds.), *T. cruzi* Infection: Methods and  
978 Protocols, *Methods Molec Biol* 1955:147-163. DOI: 10.1007/978-1-4939-9148-8\_11.

979 **Taylor MC**, Ward A, Olmo F, Jayawardhana S, Francisco AF, Lewis MD, Kelly JM.  
980 2020. Intracellular DNA replication and differentiation of *Trypanosoma cruzi* is  
981 asynchronous within individual host cells *in vivo* at all stages of infection. *PLoS Negl*  
982 *Trop Dis* 14:e0008007. DOI: 10.1371/journal.pntd.0008007.

983 **Tegazzini D**, D´ıaz R, Aguilar F, Pe˜na I, Presa JL, Yardley V, Martin JJ, Coteron JM,  
984 Croft SL, Cantizani J. 2016. A replicative *in vitro* assay for drug discovery against  
985 *Leishmania donovani*. *Antimicrob Agents Chemother* 60:3524-3532. DOI:  
986 10.1128/AAC.01781-15.

987 **Teuscher F**, Chen N, Kyle DE, Gatton ML, Cheng Q. 2012. Phenotypic changes in  
988 artemisinin-resistant *Plasmodium falciparum* lines *in vitro*: evidence for decreased  
989 sensitivity to dormancy and growth inhibition. *Antimicrob Agents Chemother* 56, 428–  
990 431. DOI: 10.1128/AAC.05456-11.

991 **Tucker MS**, Mutka T, Sparks K, Patel J, Kyle DE. 2012. Phenotypic and genotypic  
992 analysis of *in vitro*-selected artemisinin-resistant progeny of *Plasmodium falciparum*.  
993 *Antimicrob Agents Chemother* 56:302–314. DOI: 10.1128/AAC.05540-11.

- 994 **Verma N**, Franchitto M, Zonfrilli A, Cialfi S, Palermo R, Talora C. 2019. DNA damage  
995 stress: Cui prodest? *Int J Mol Sci* 20:1073. DOI: 10.3390/ijms20051073.
- 996 **Waldman BS**, Schwarz D, Wadsworth MH, Saeij JP, Shalek AK, Lourido S. 2020.  
997 Identification of a master regulator of differentiation in *Toxoplasma*. *Cell* 180:359–  
998 372.e16. DOI: 10.1016/j.cell.2019.12.013.
- 999 **Ward AI**, Lewis MD, Khan A, McCann CJ, Francisco AF, Jayawardhana S, Taylor MC,  
1000 Kelly JM. 2020. *In vivo* analysis of *Trypanosoma cruzi* persistence foci in chronically  
1001 infected mice at single cell resolution. *mBio* 11:e01242-20. DOI: 10.1128/mBio.01242-  
1002 20.
- 1003 **Weidner-Glunde M**, Kruminis-Kaszkiel E, Savanagoudar M. 2020. Herpesviral  
1004 latency-common themes. *Pathogens* 9:125. DOI: 10.3390/pathogens9020125.
- 1005 **Wright MC**, Logan GJ, Bolock AM, Kubicki AC, Hemphill JA, Sanders TA, Maricich  
1006 SM. 2017. Merkel cells are long-lived cells whose production is stimulated by skin  
1007 injury. *Dev Biol* 422:4–13. DOI: 10.1016/j.ydbio.2016.12.020.
- 1008 **Zhao H**, Halicka HD, Li J, Biela E, Berniak K, Dobrucki J, Darzynkiewicz Z. (2013)  
1009 DNA damage signaling, impairment of cell cycle progression, and apoptosis triggered  
1010 by 5-ethynyl-2'-deoxyuridine incorporated into DNA. *Cytometry A* 83:979-988. DOI:  
1011 10.1002/cyto.a.22396.
- 1012
- 1013
- 1014
- 1015
- 1016
